# Supplementary material
Source: PubMed Central journal article supplement (PMC3909955)

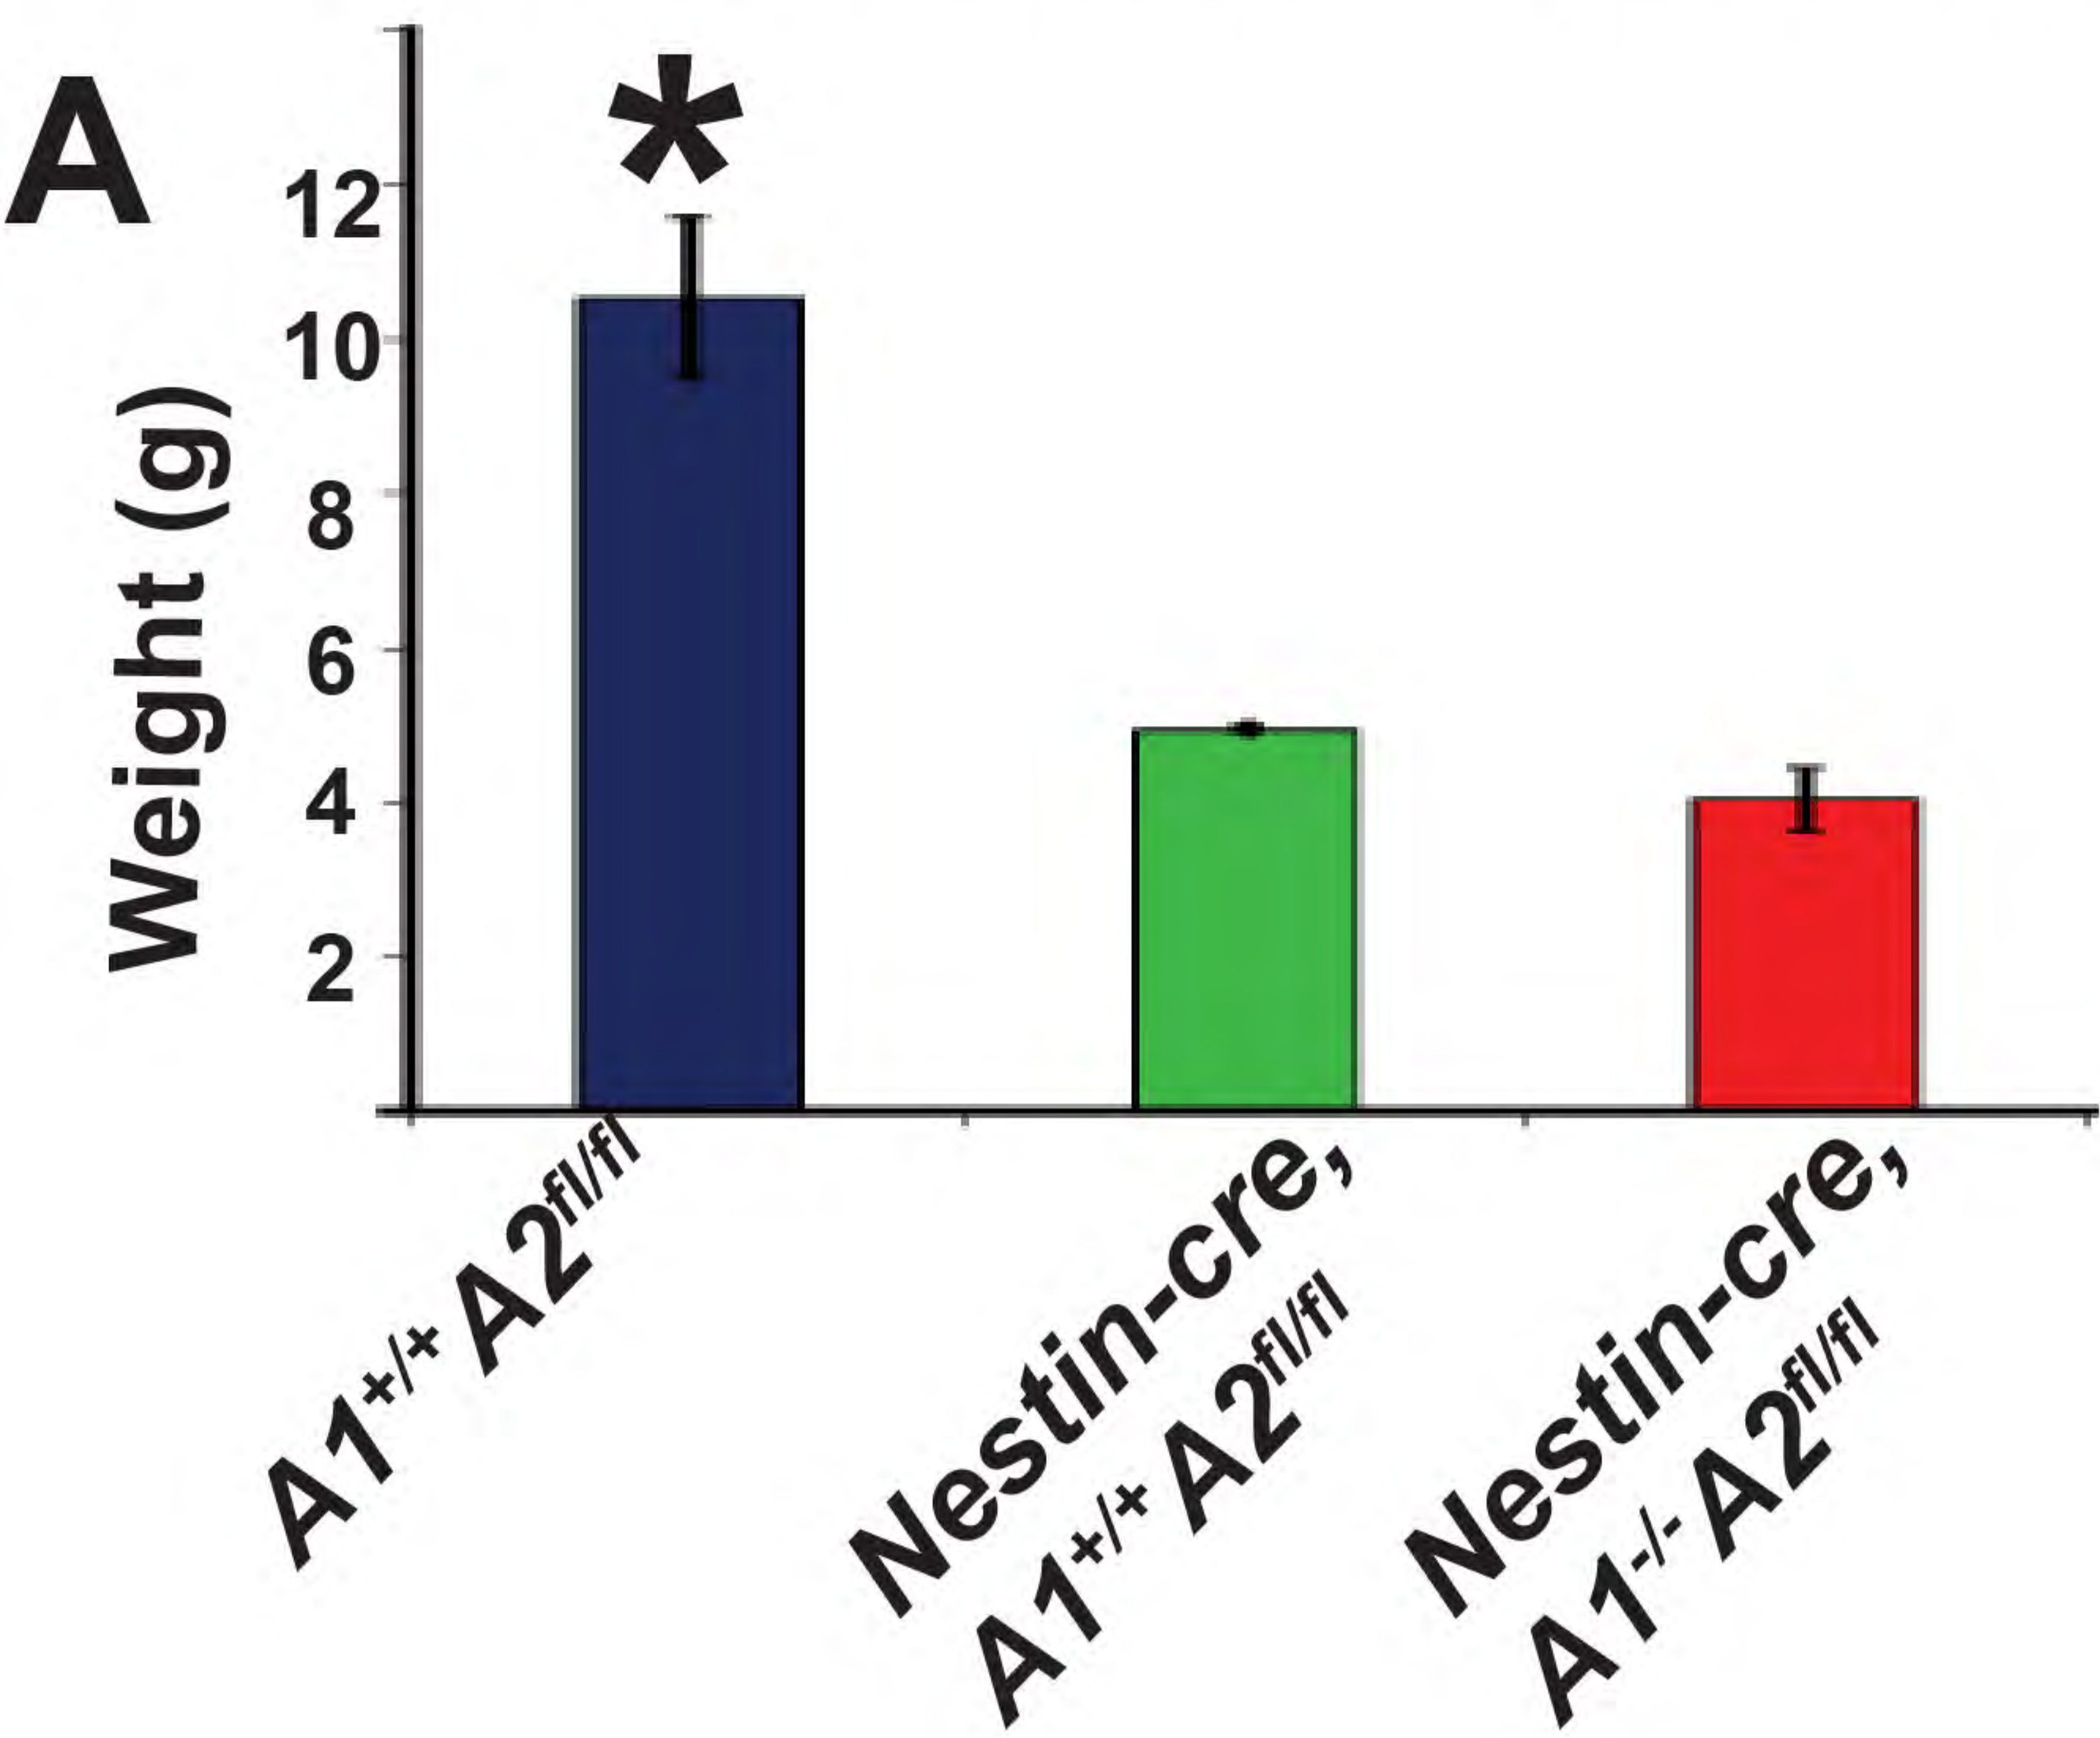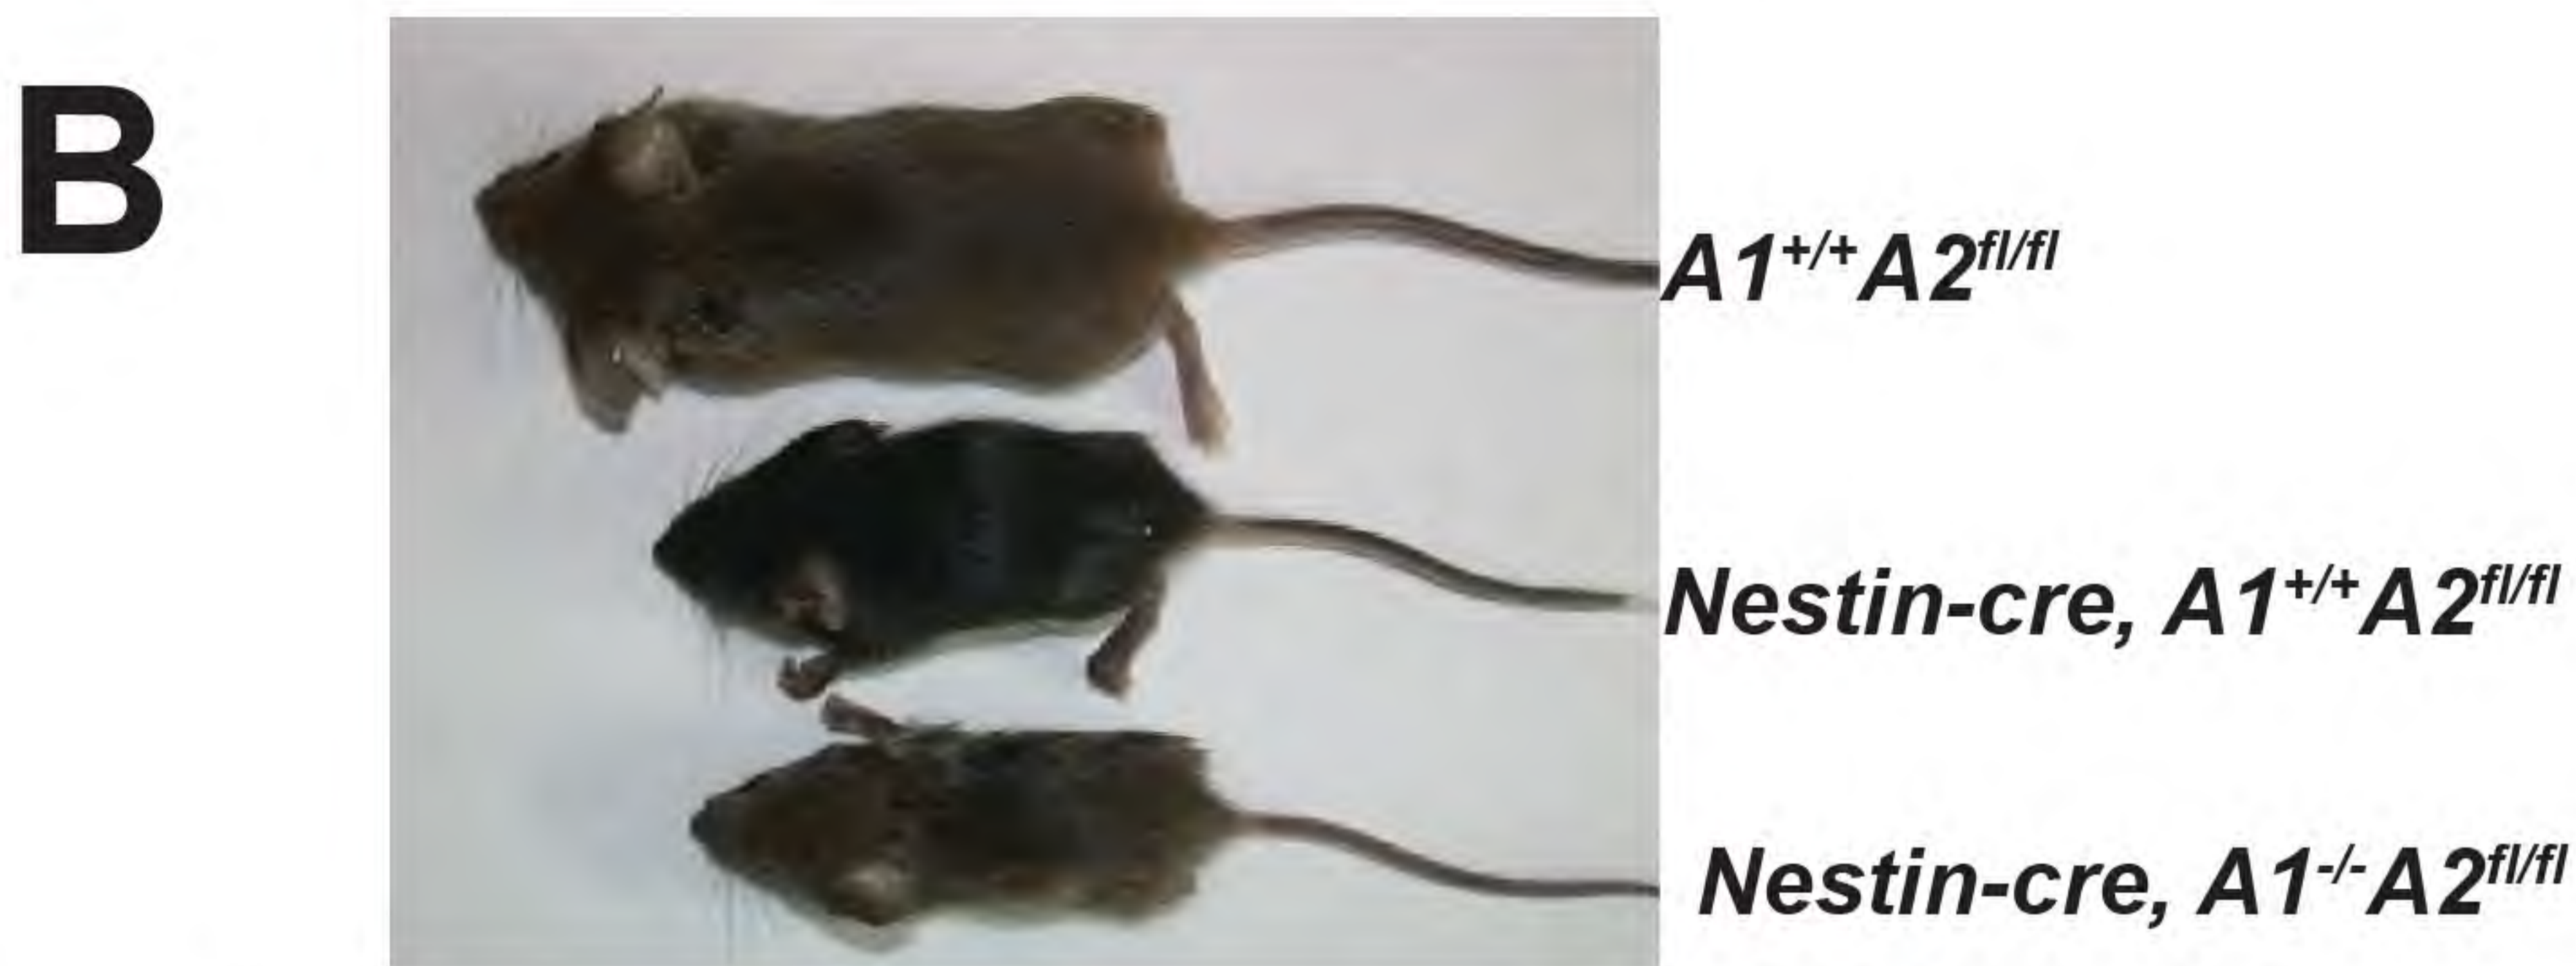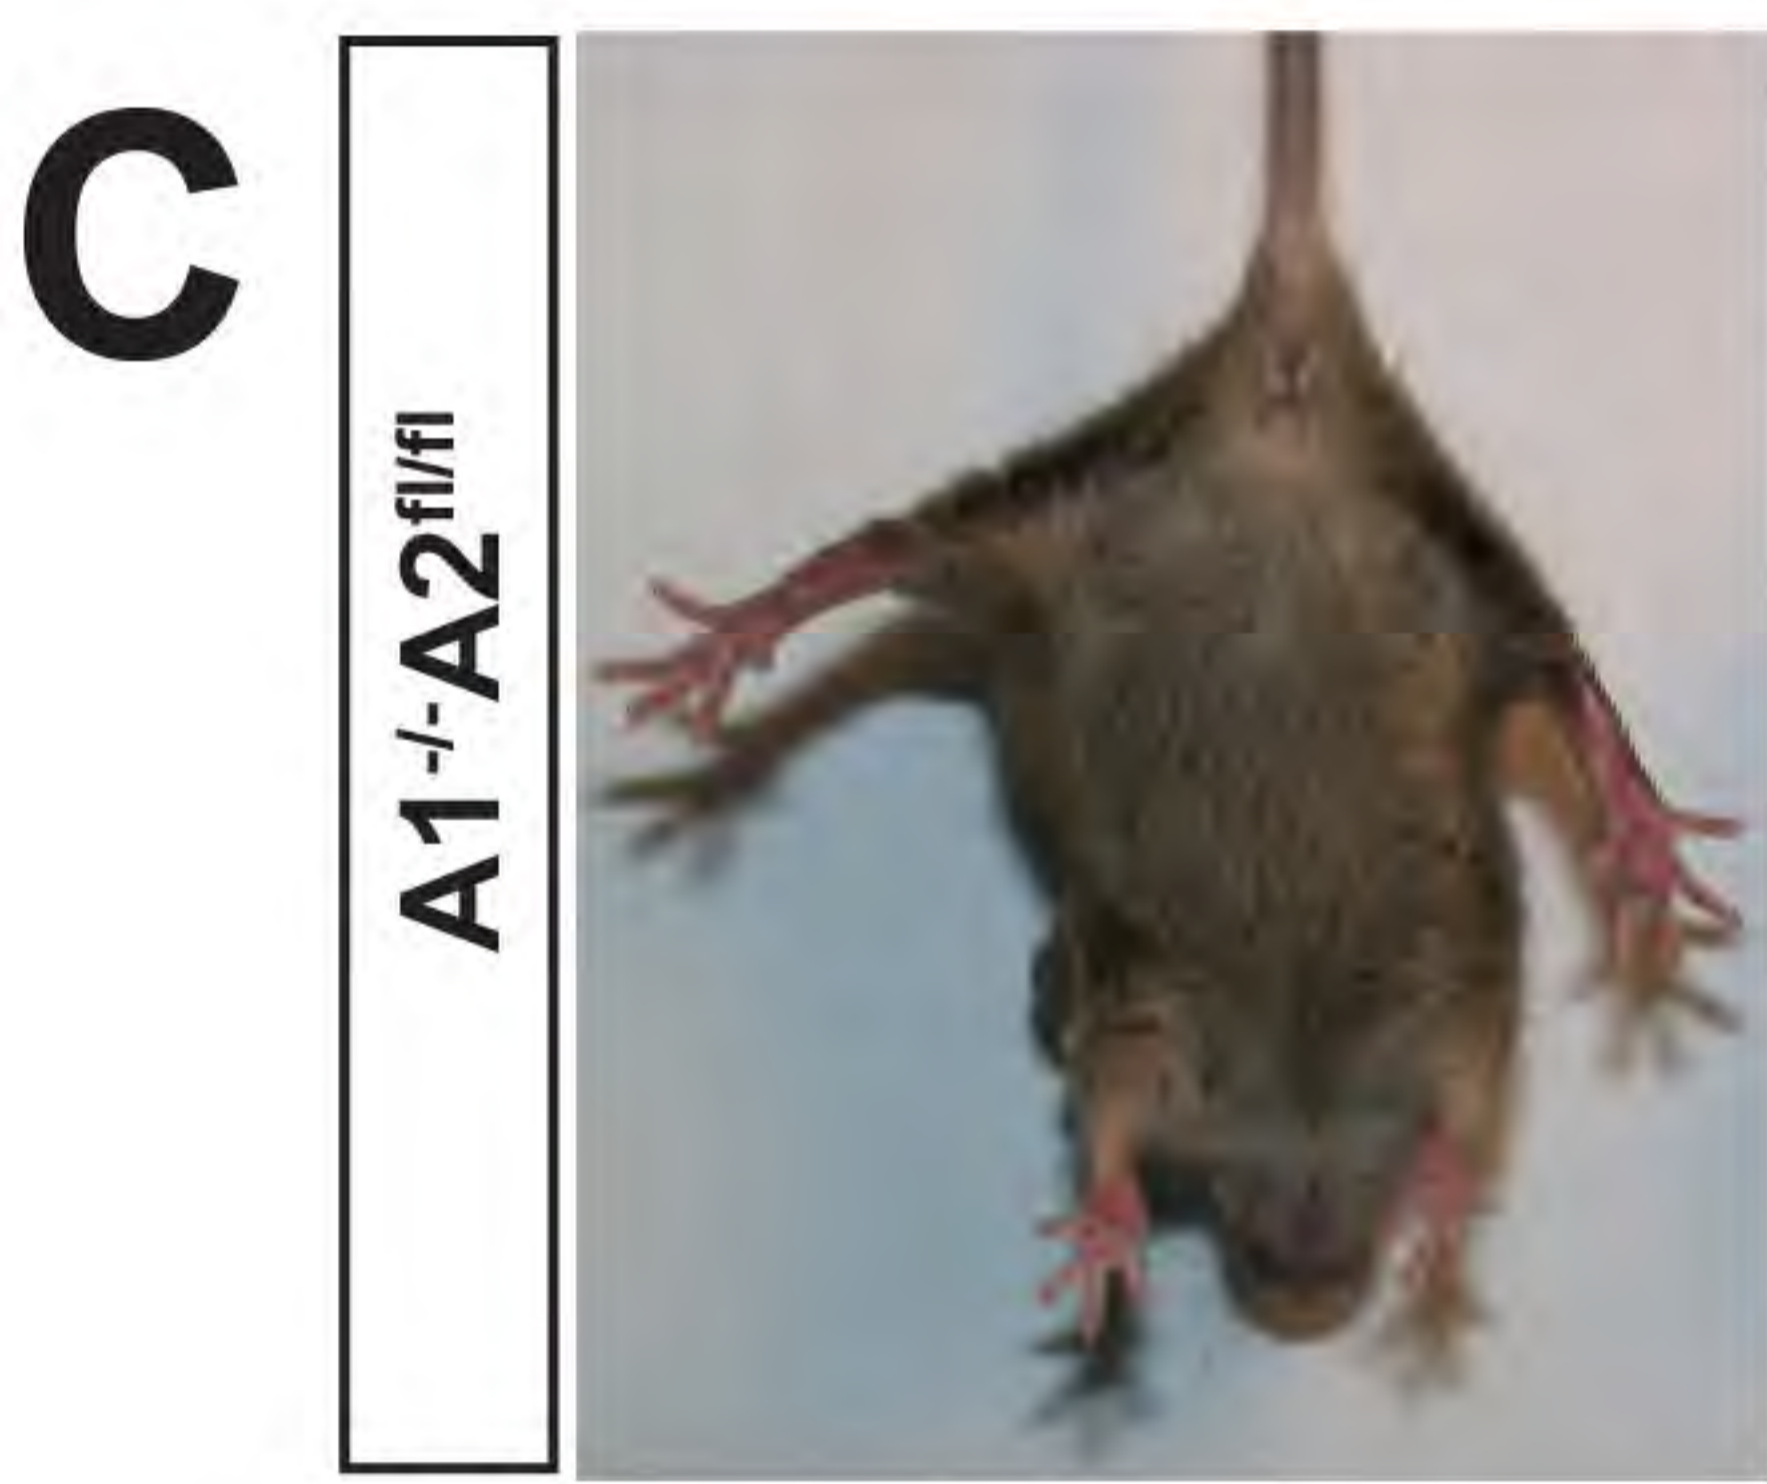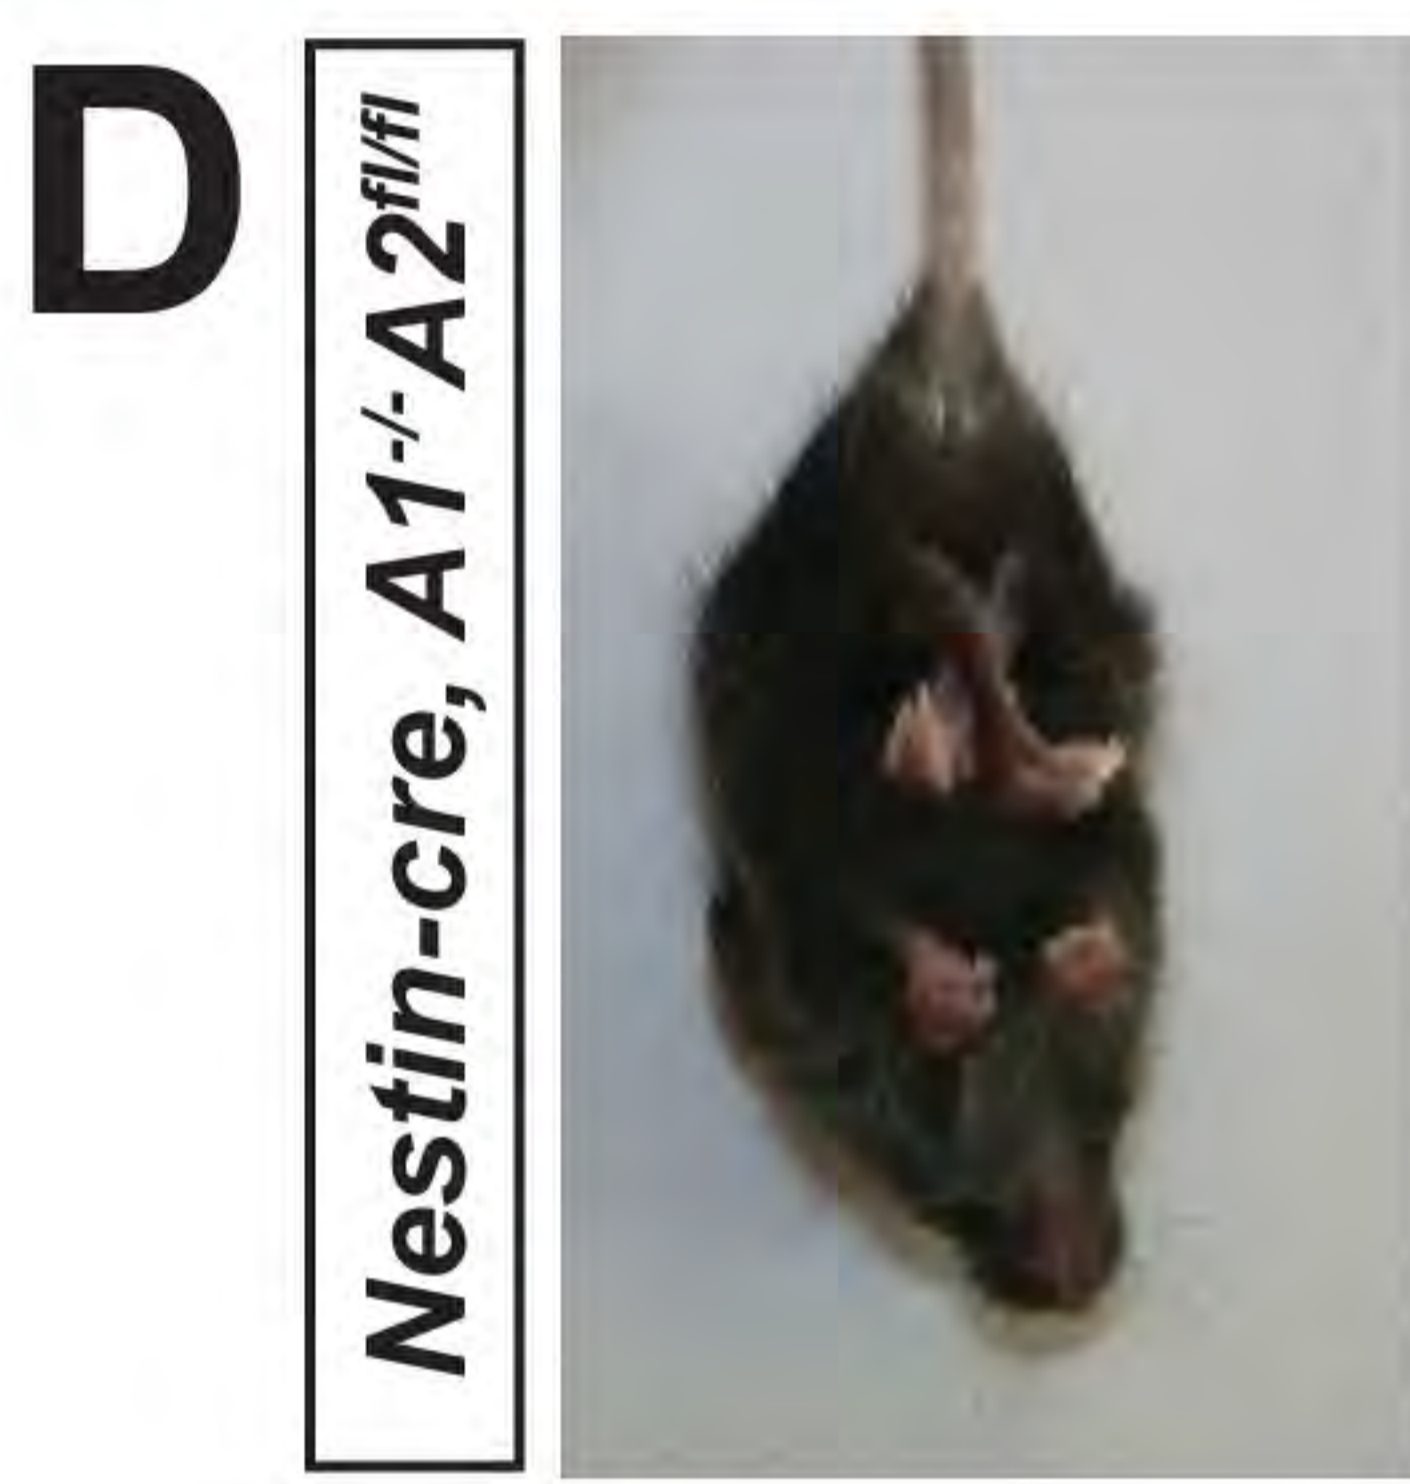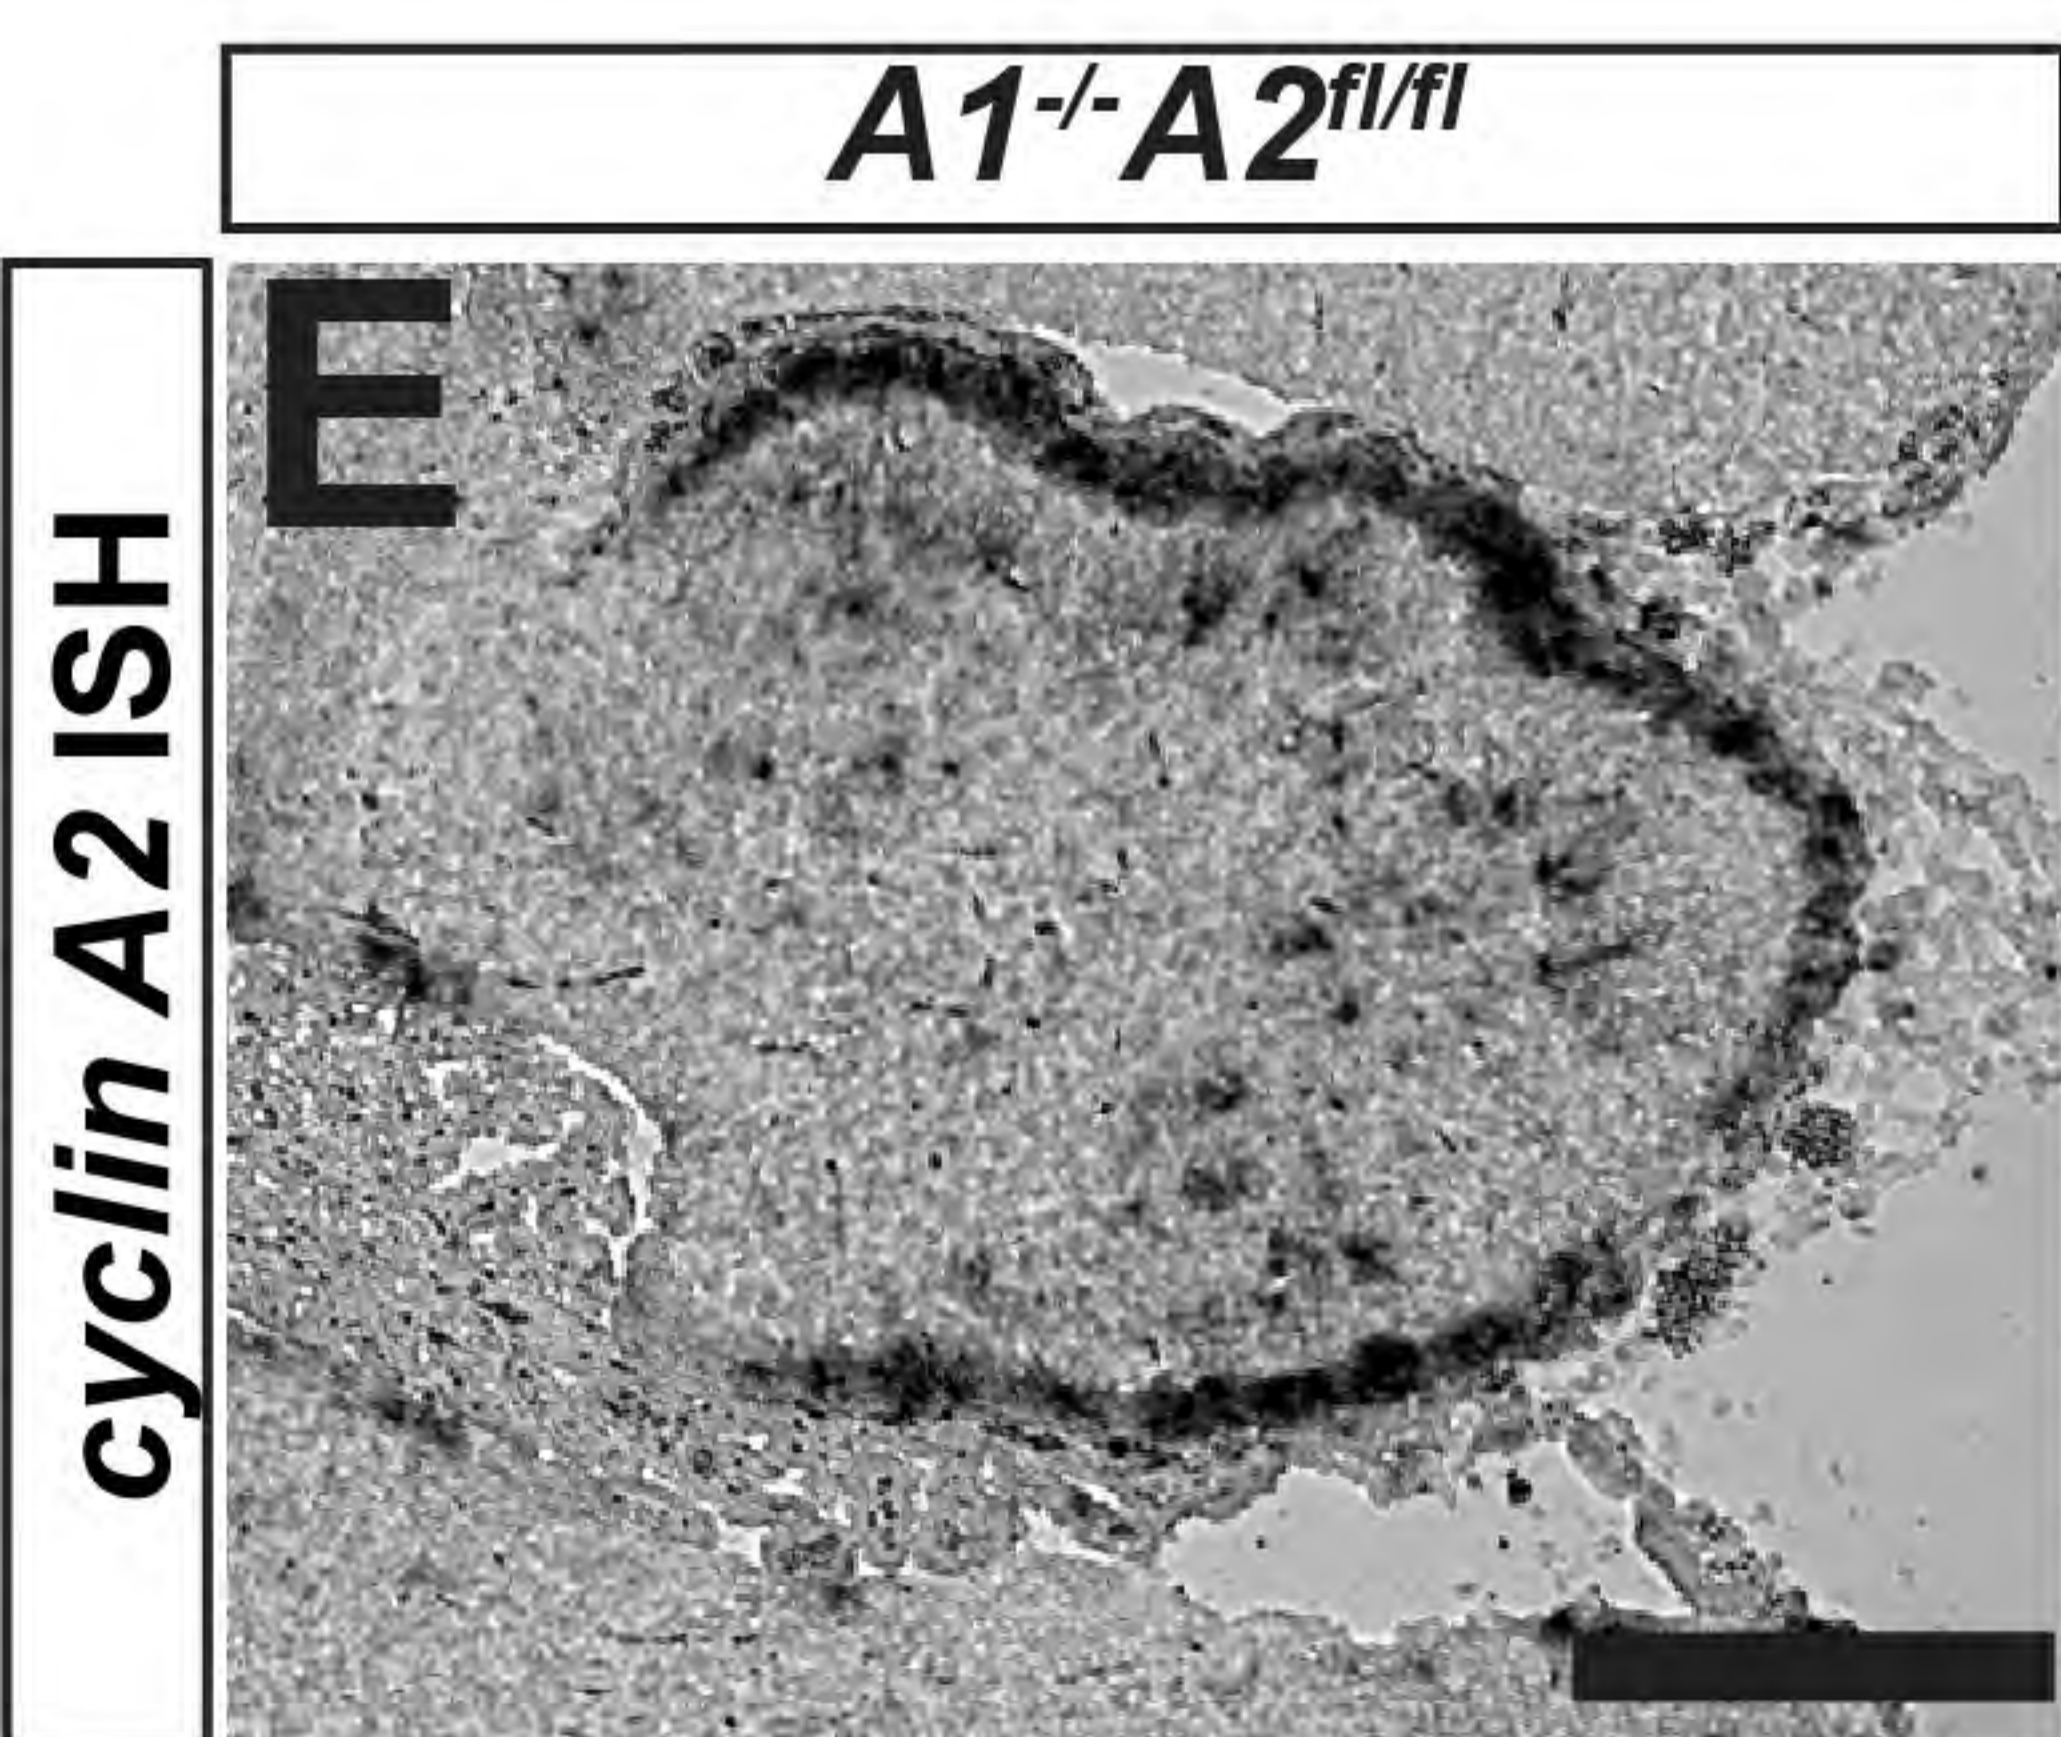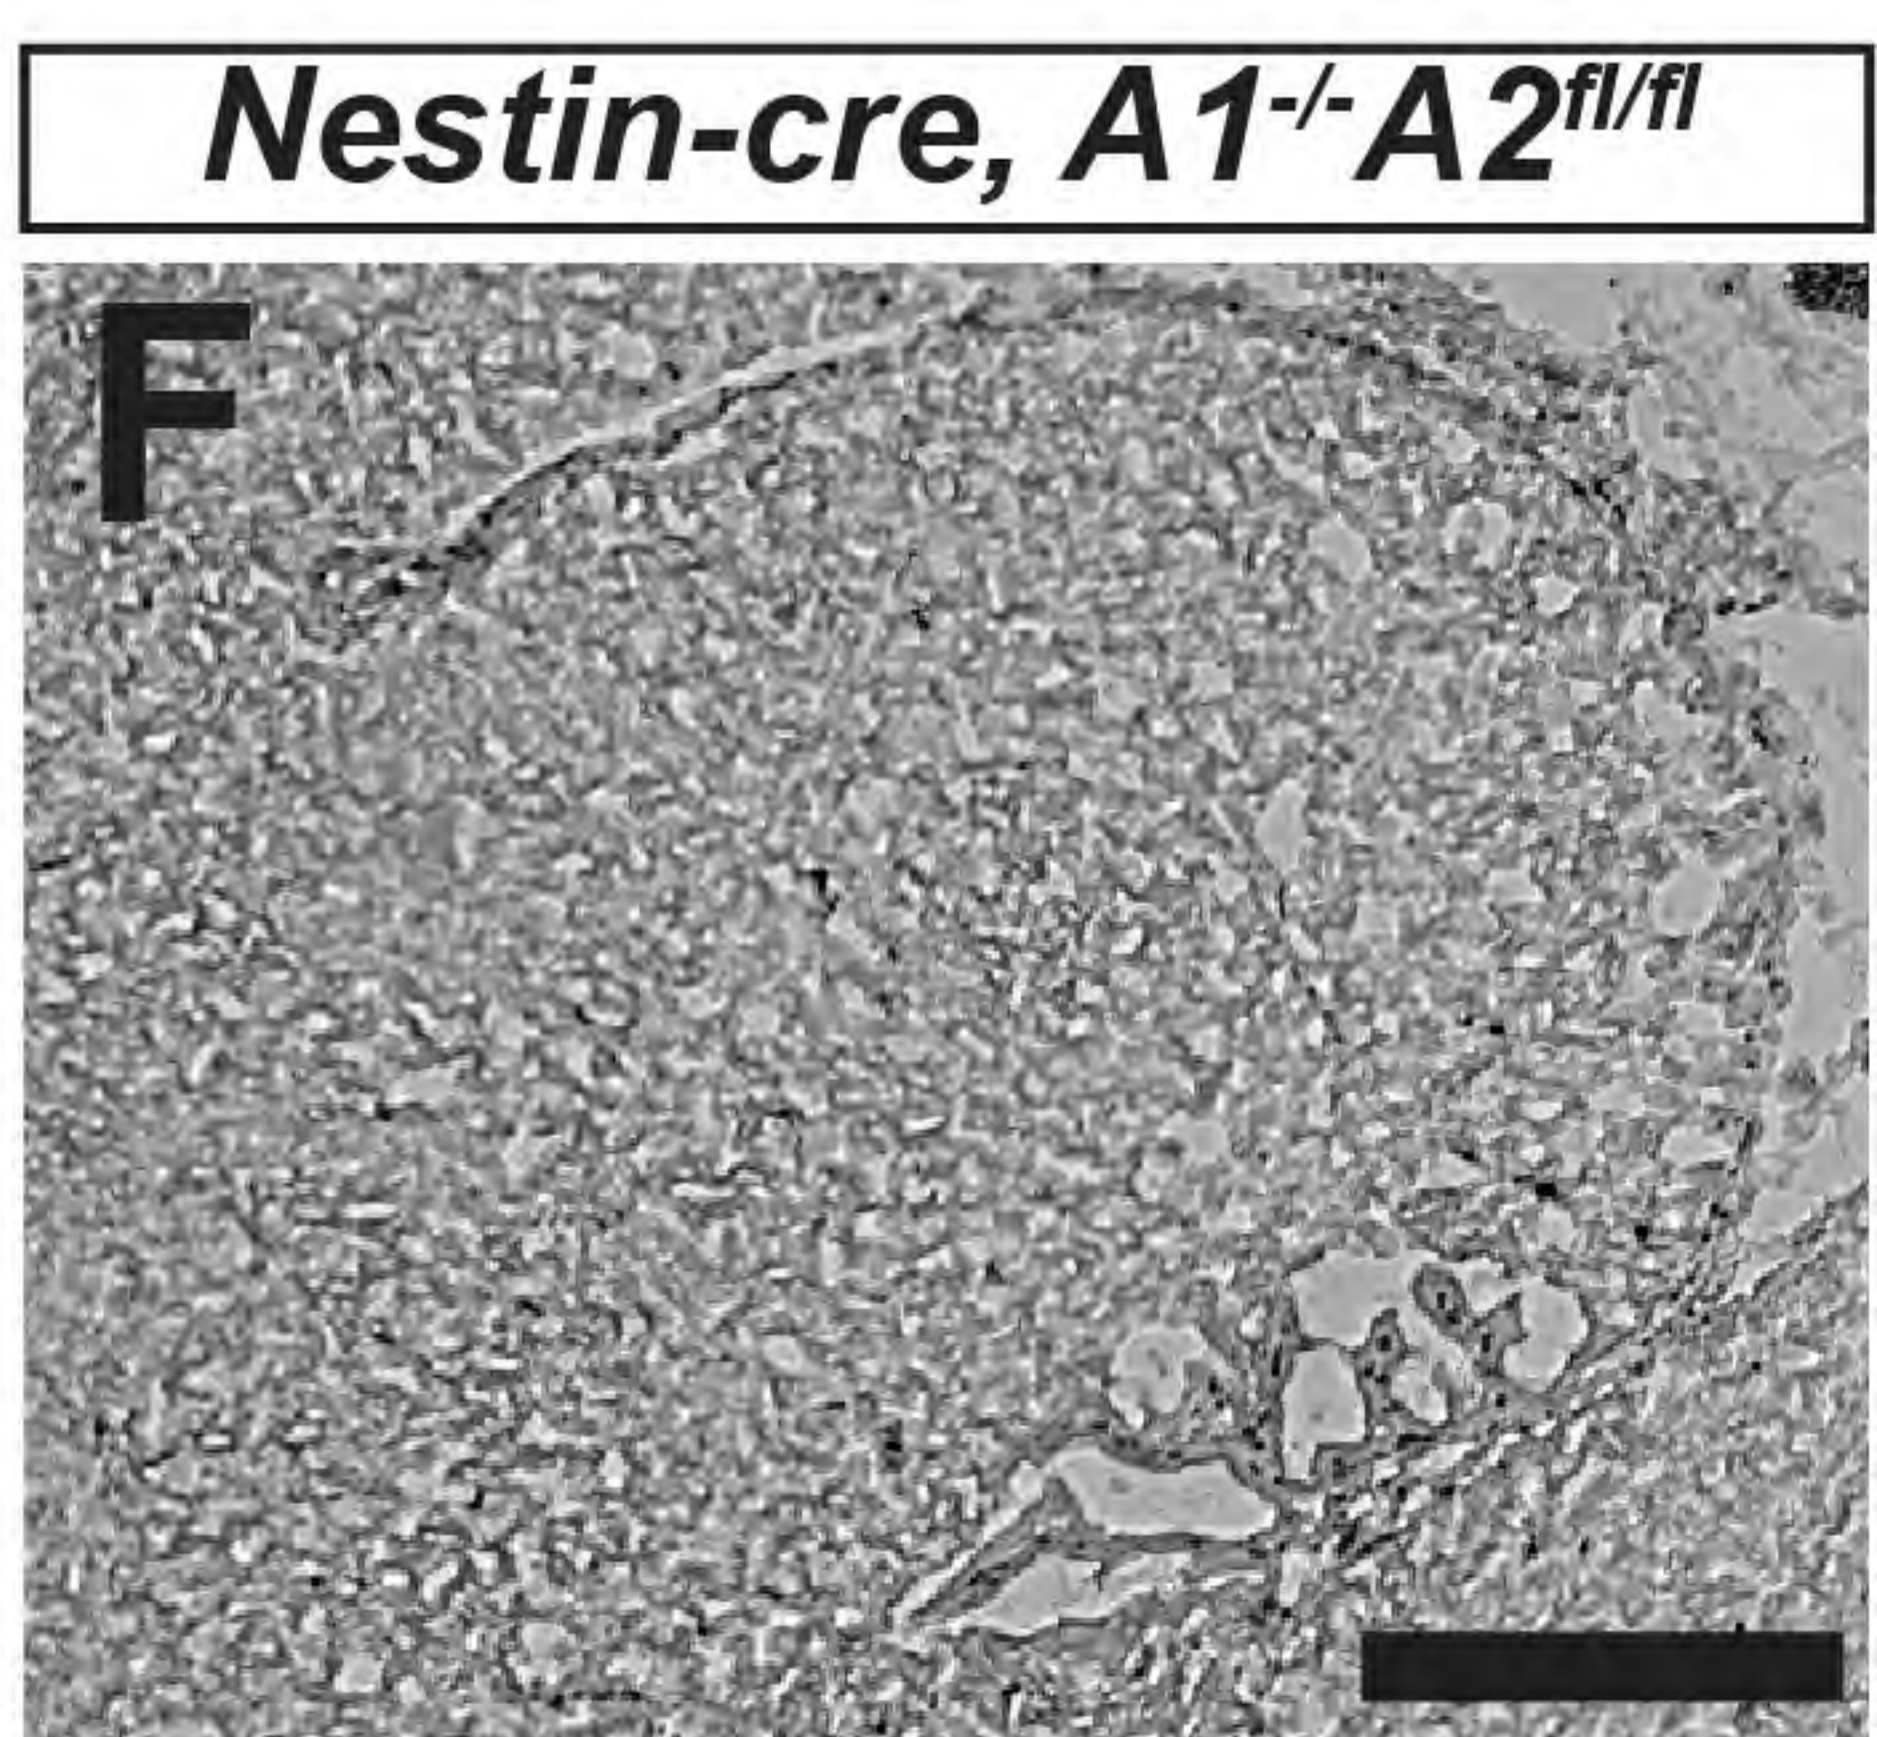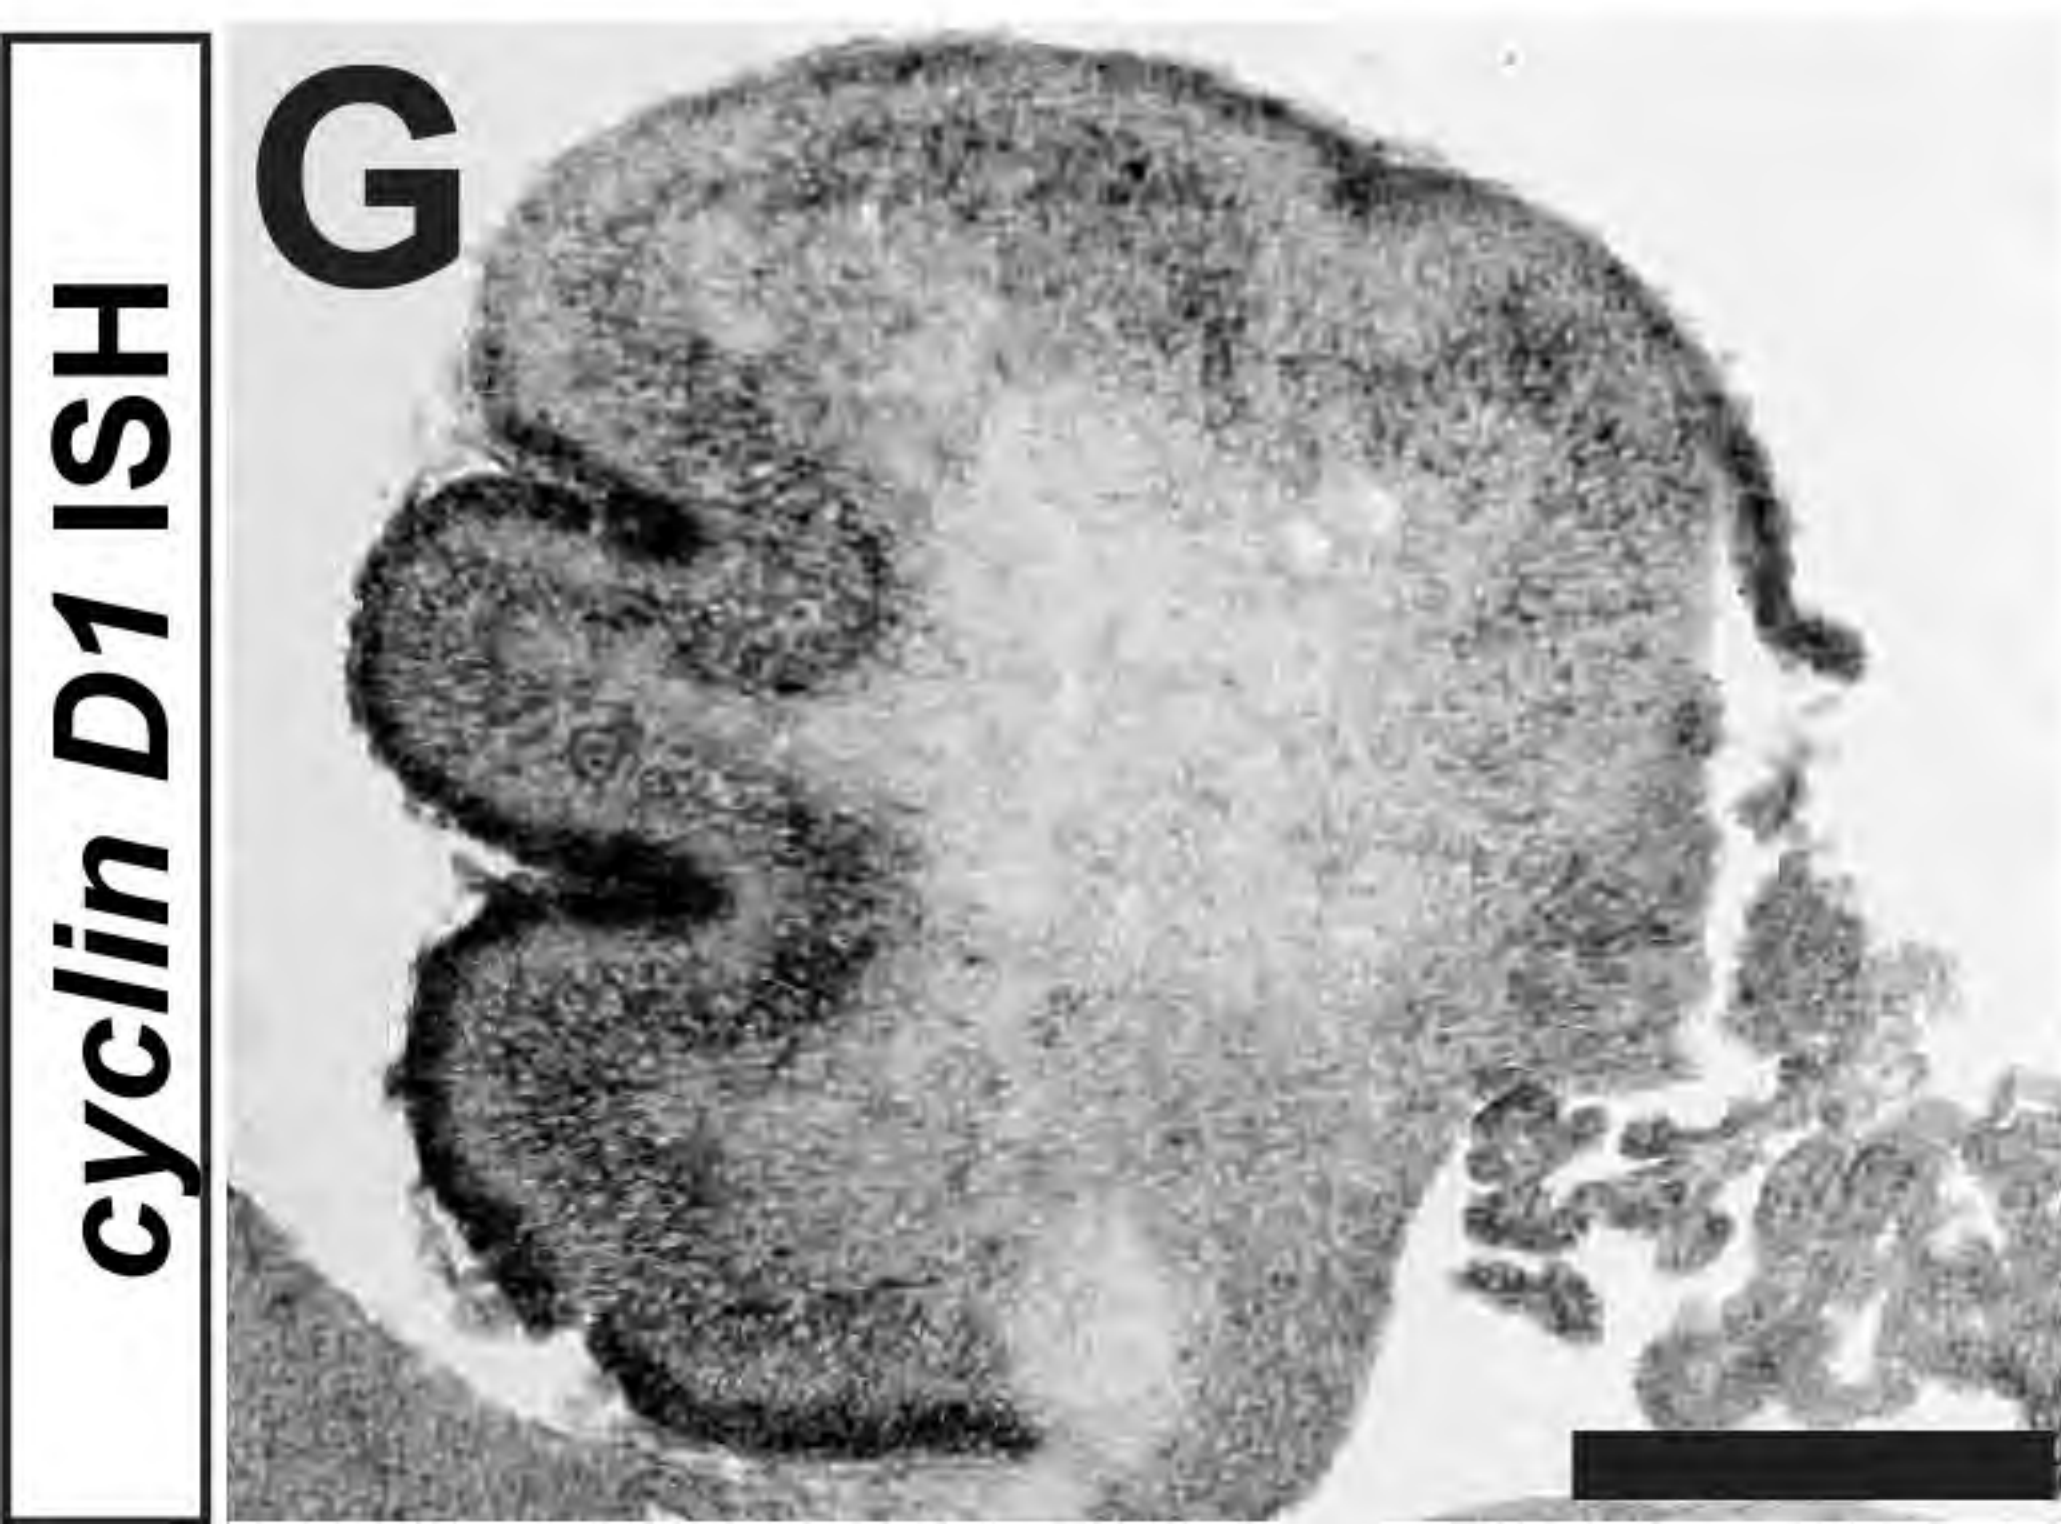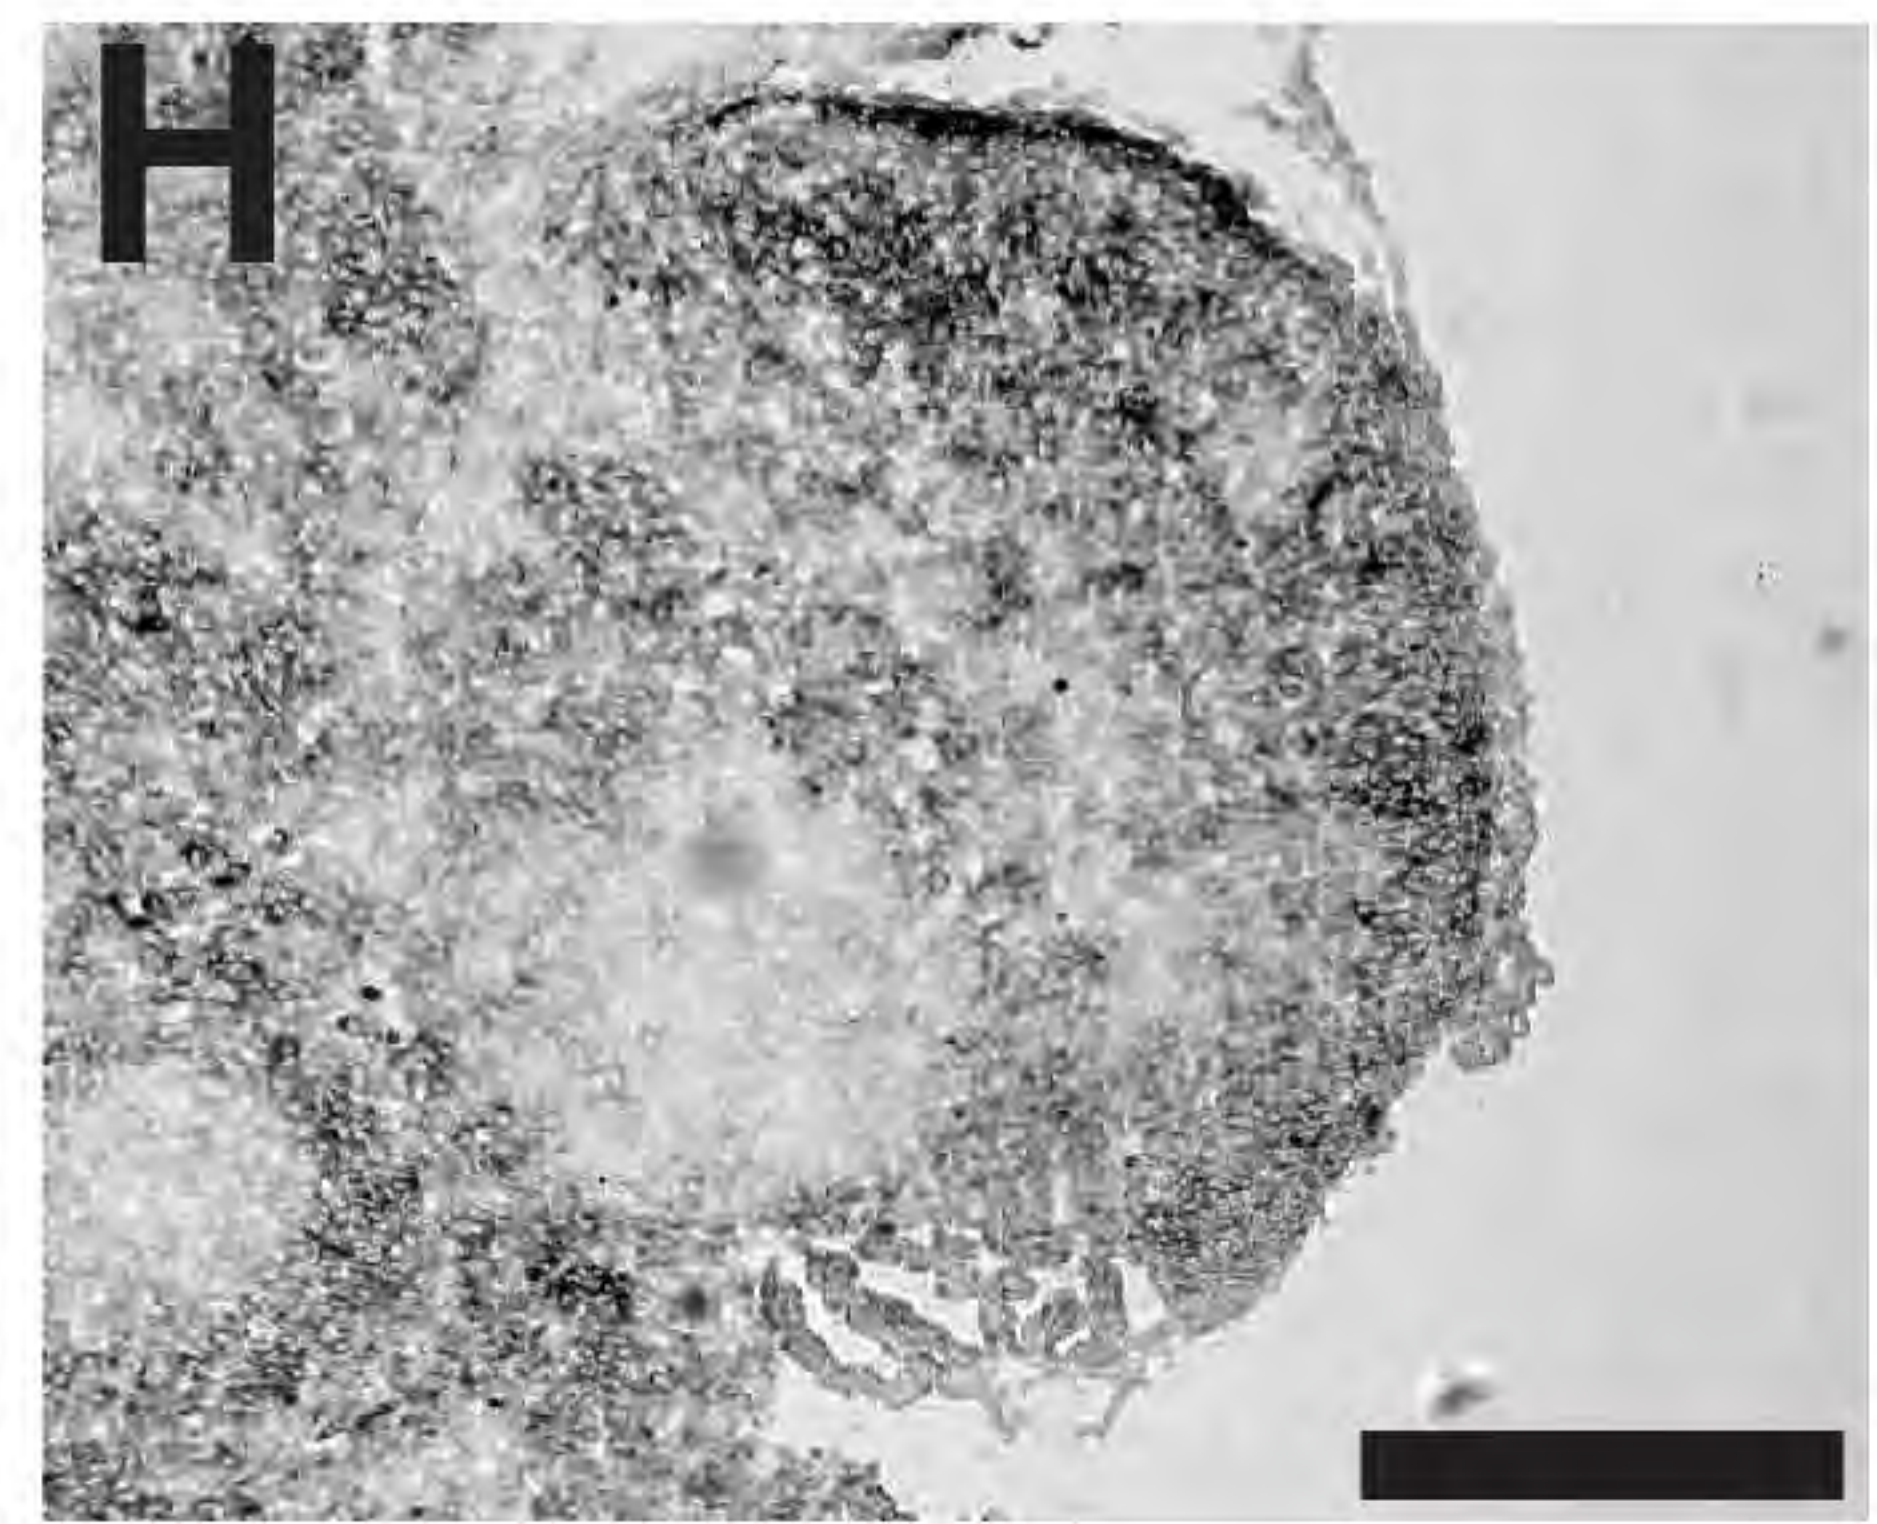

Supplement: NIHMS539665-supplement-01.pdf [file NIHMS539665-supplement-01.pdf]

**A: CyclinE1 in *Nestin-cre, A2<sup>fl/fl</sup>* Mice**

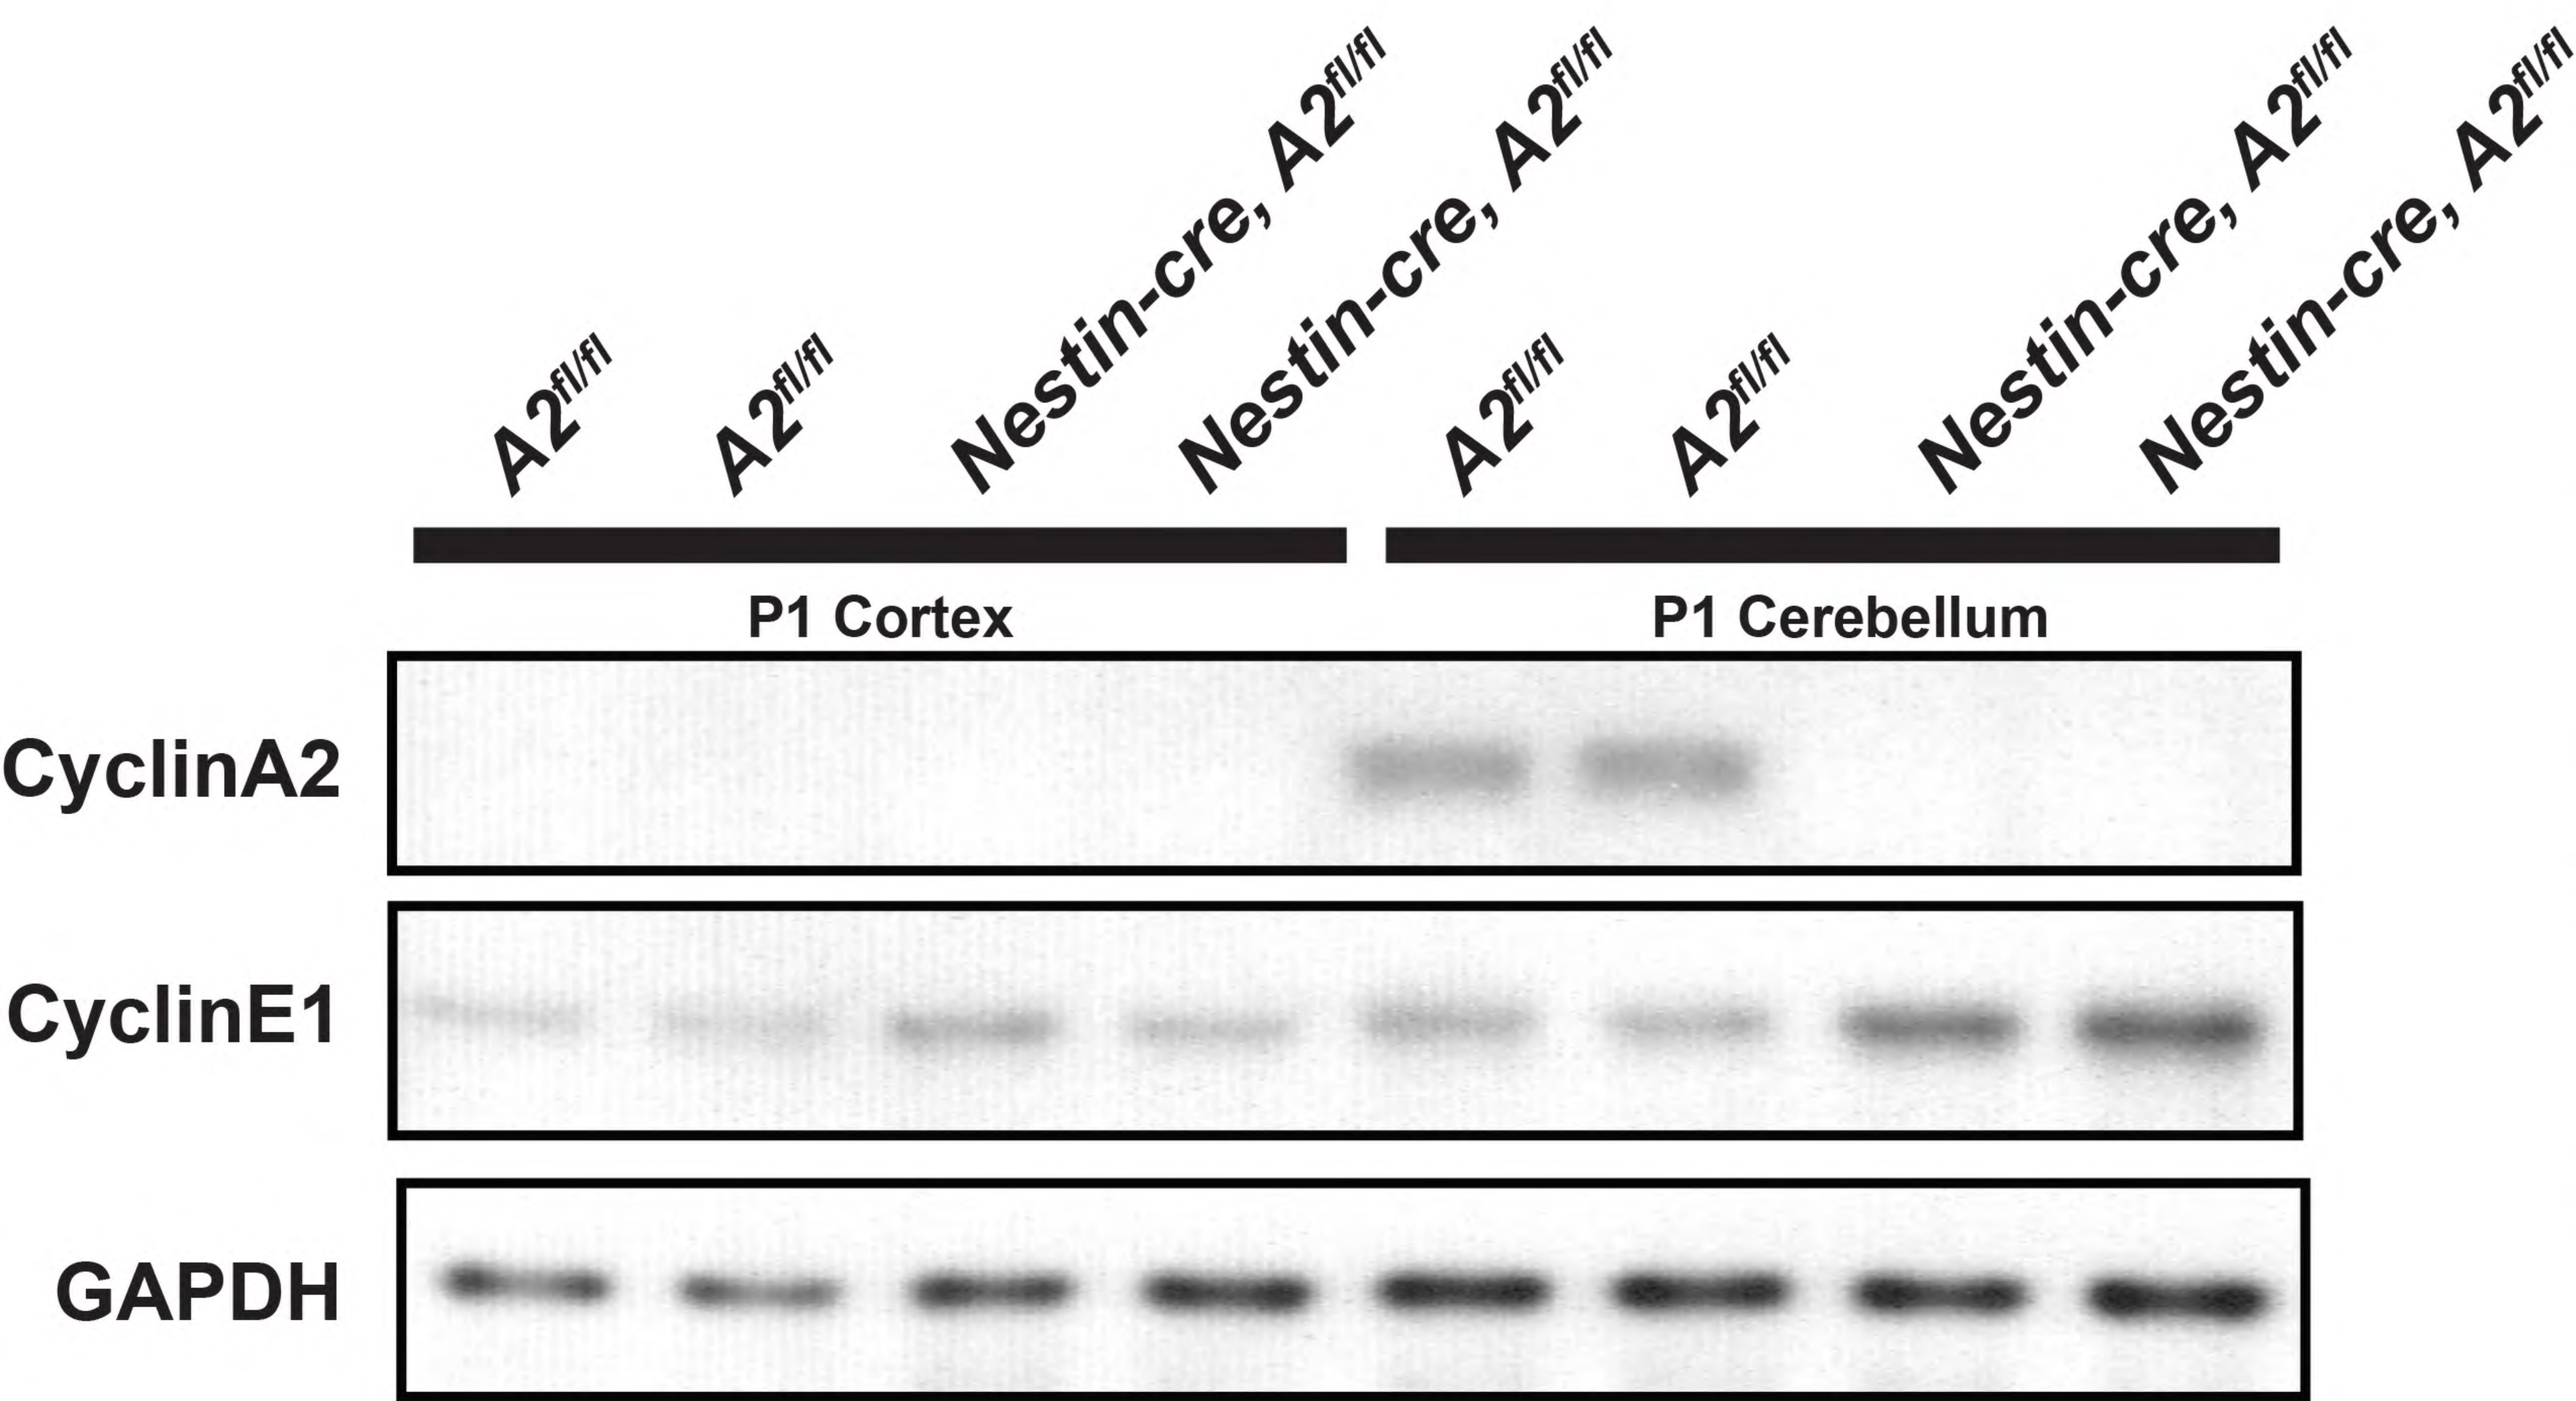

**P7**

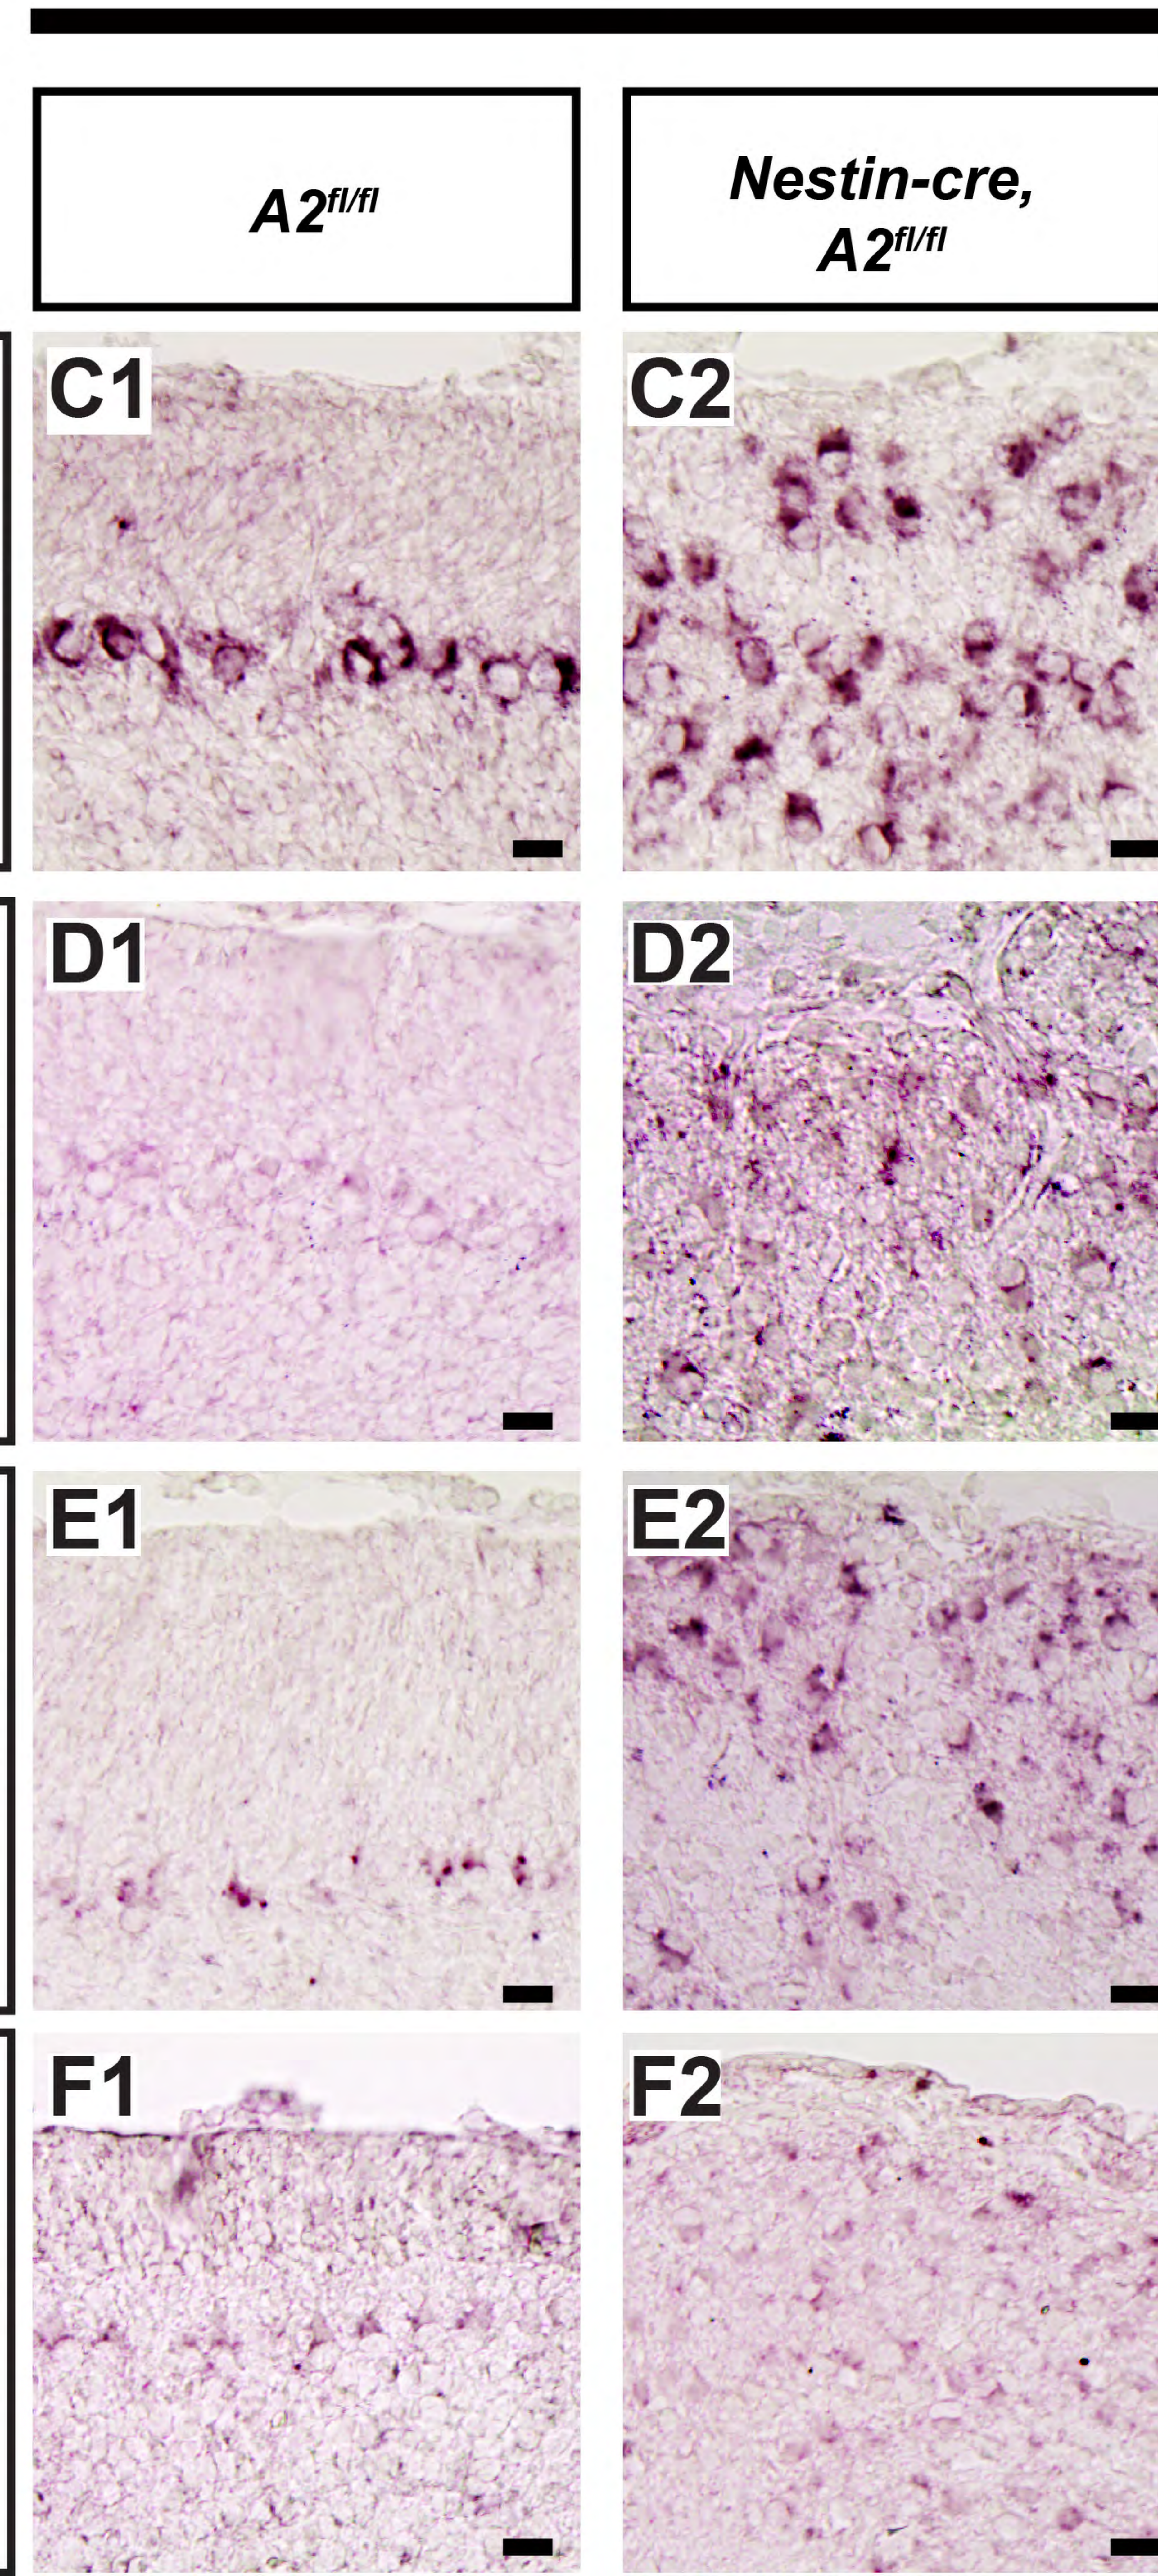

**B: Mitosis in P0 EGL**

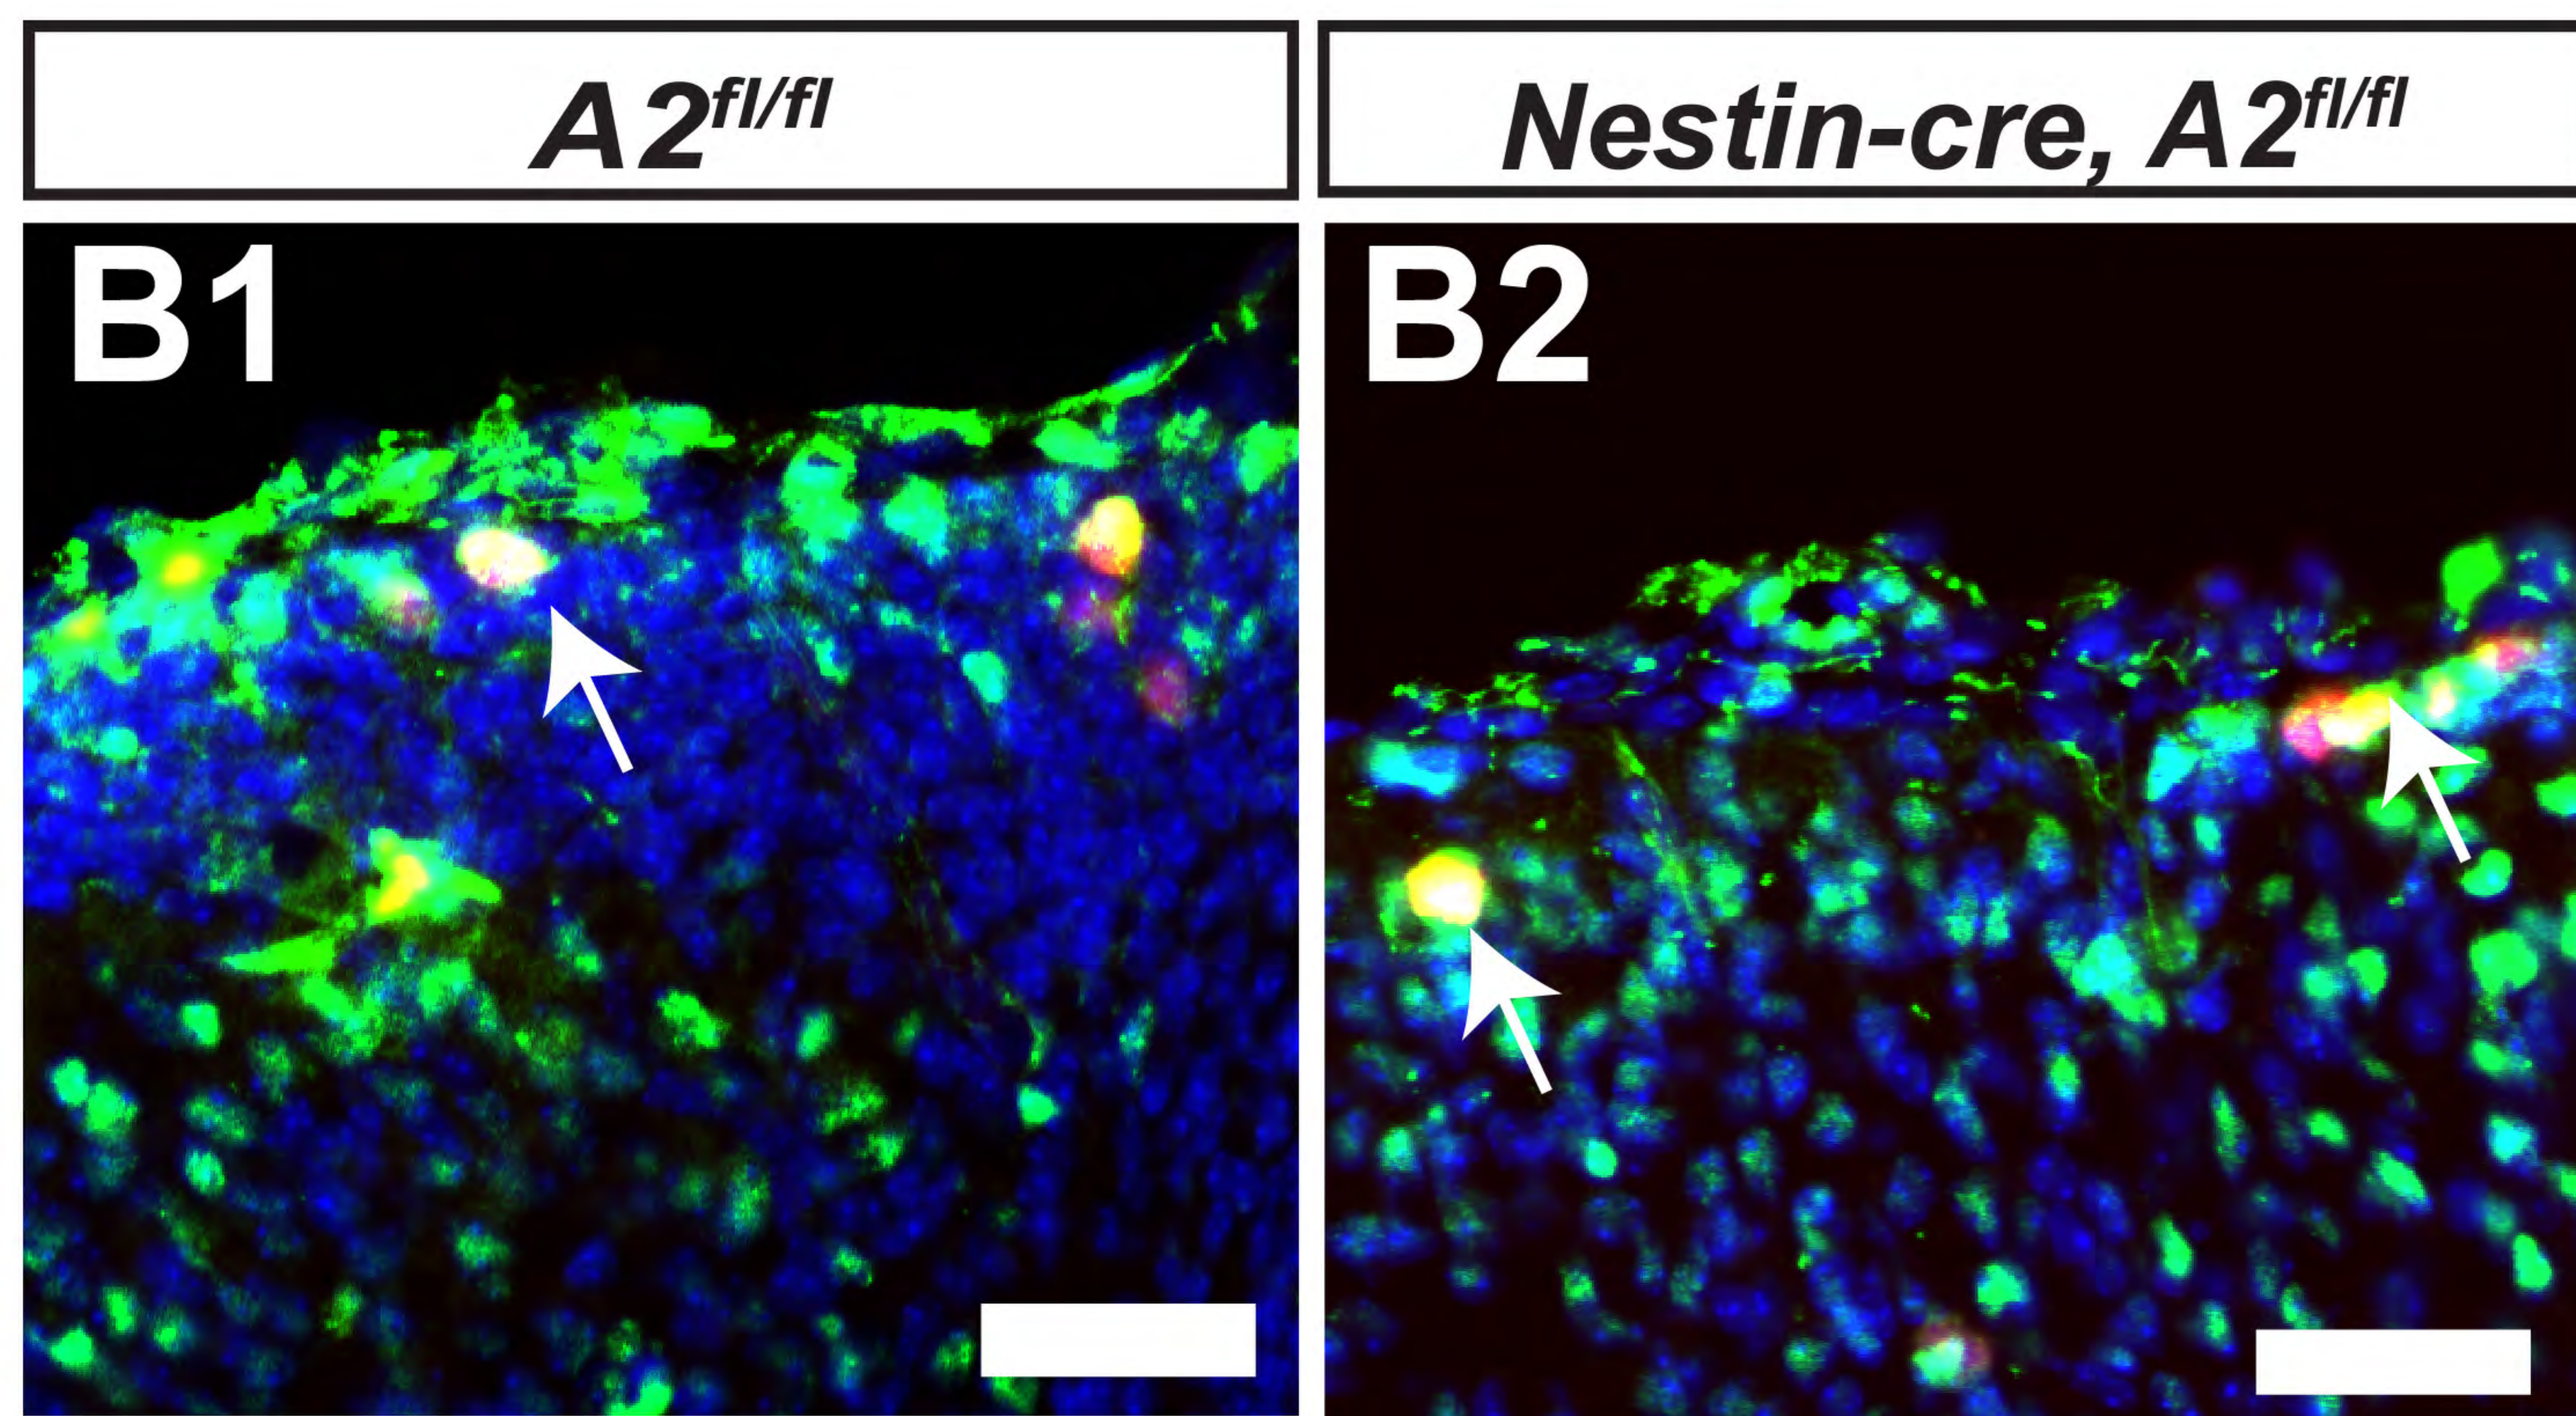

**Cyclin E1/pH3**

Supplement: NIHMS539665-supplement-02.pdf [file NIHMS539665-supplement-02.pdf]

*MATH1-cre, Nmyc<sup>fl/fl</sup>*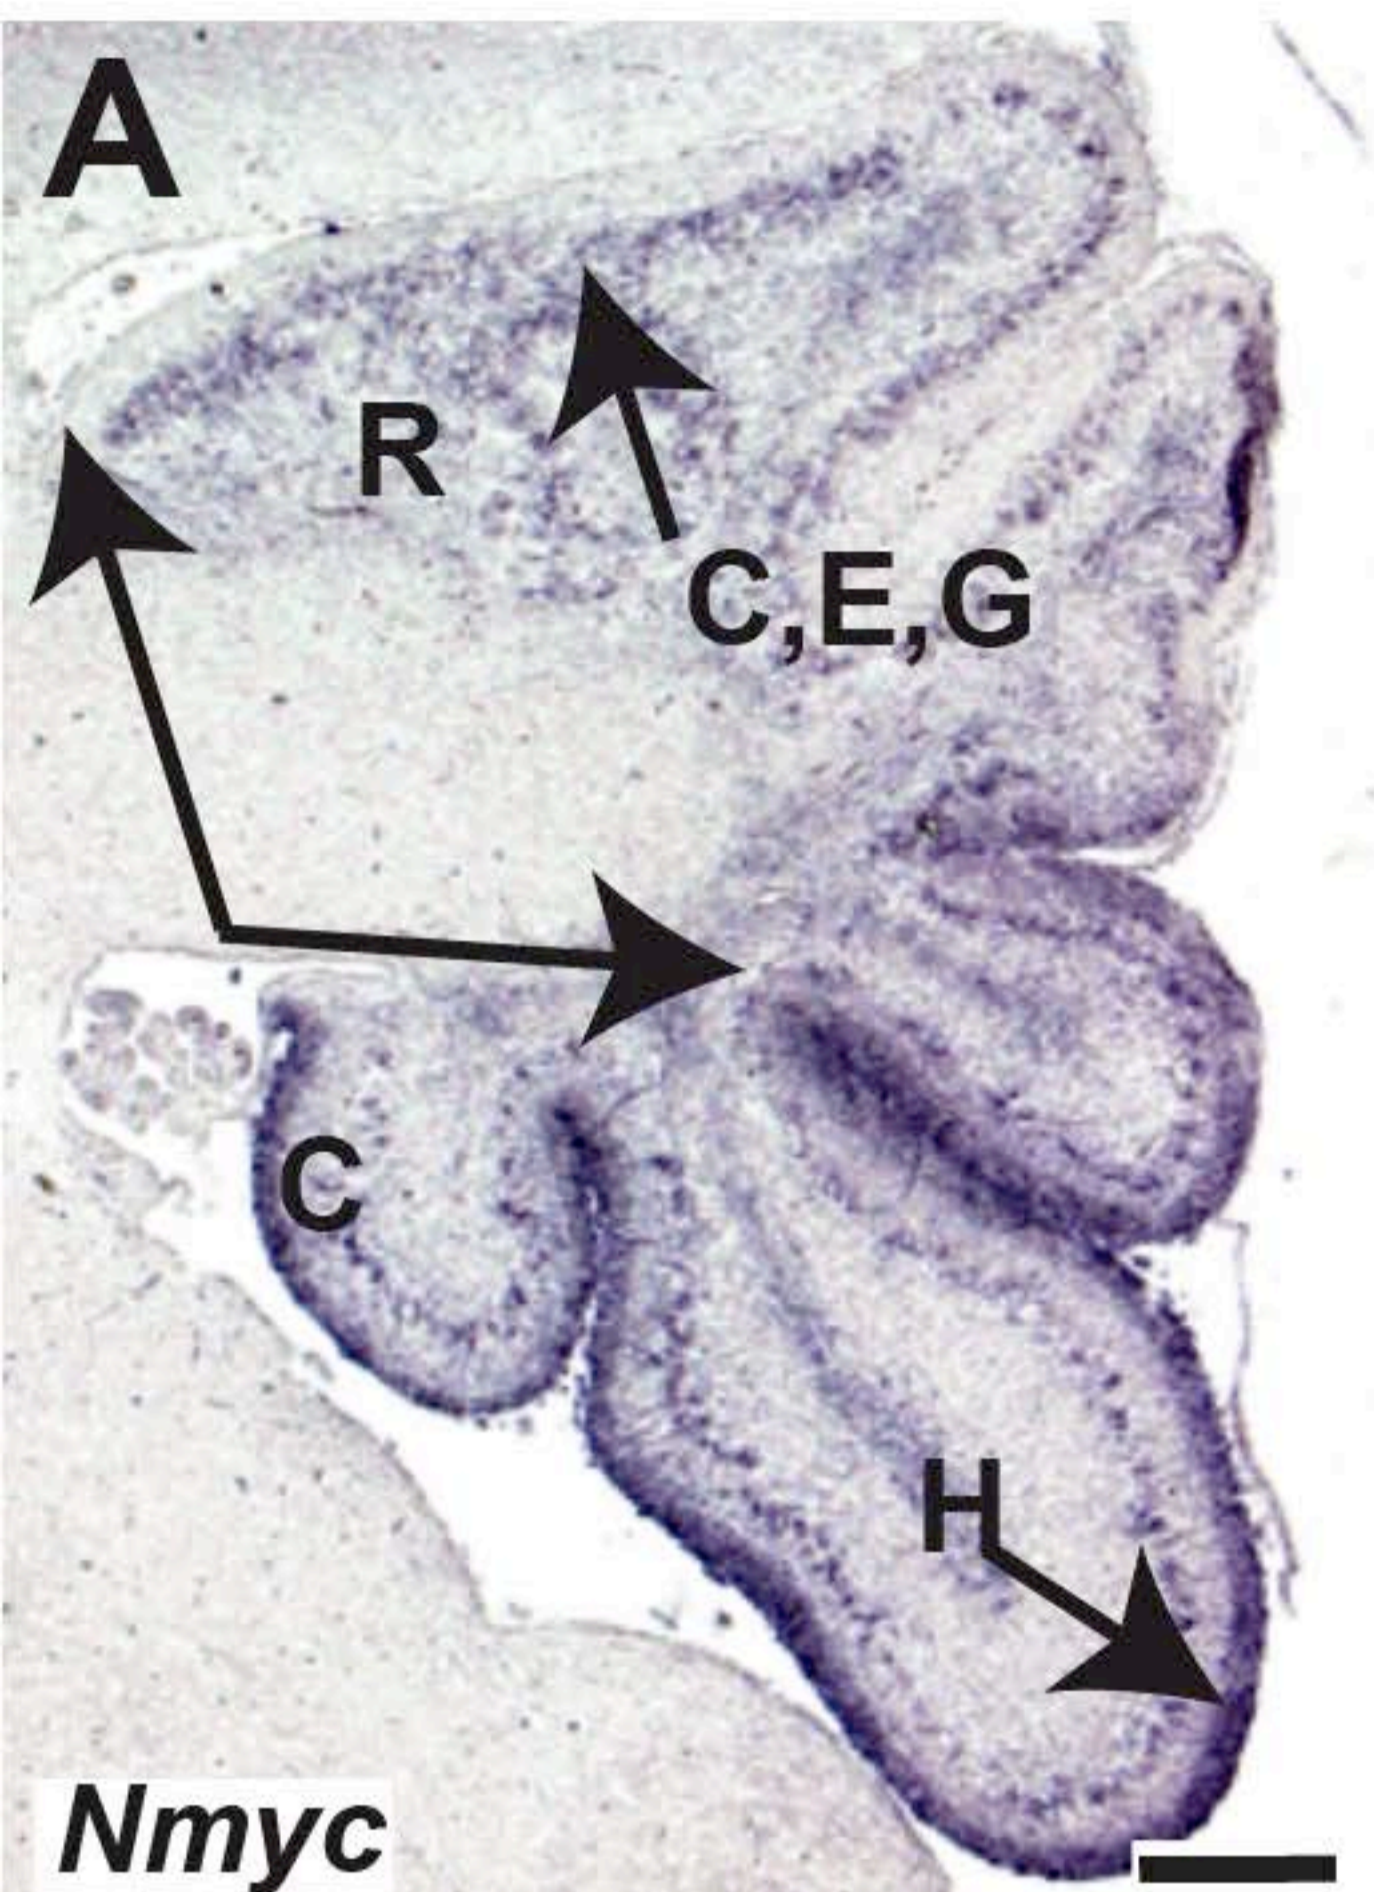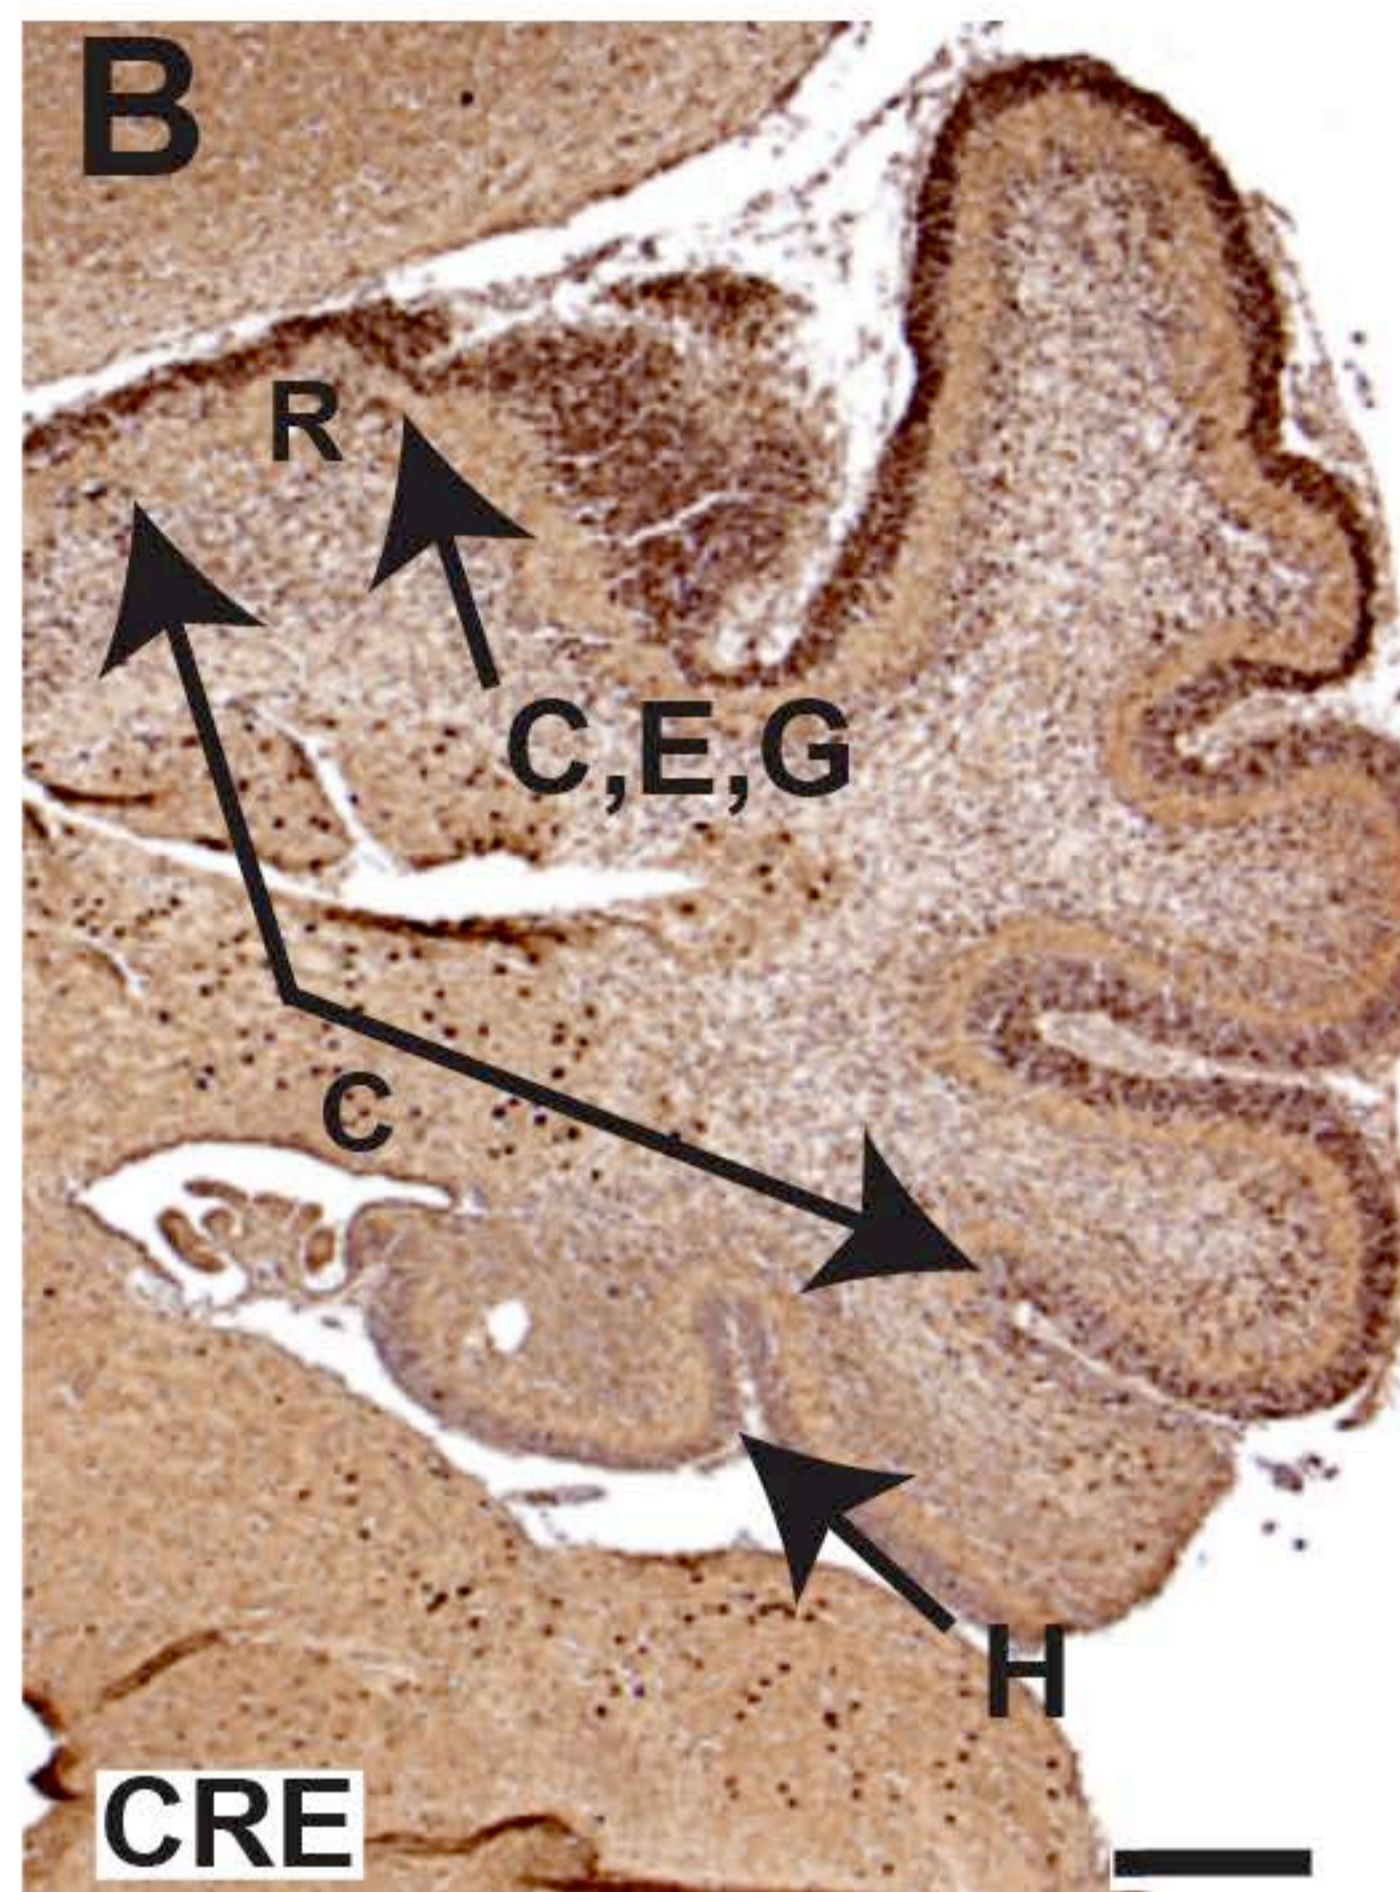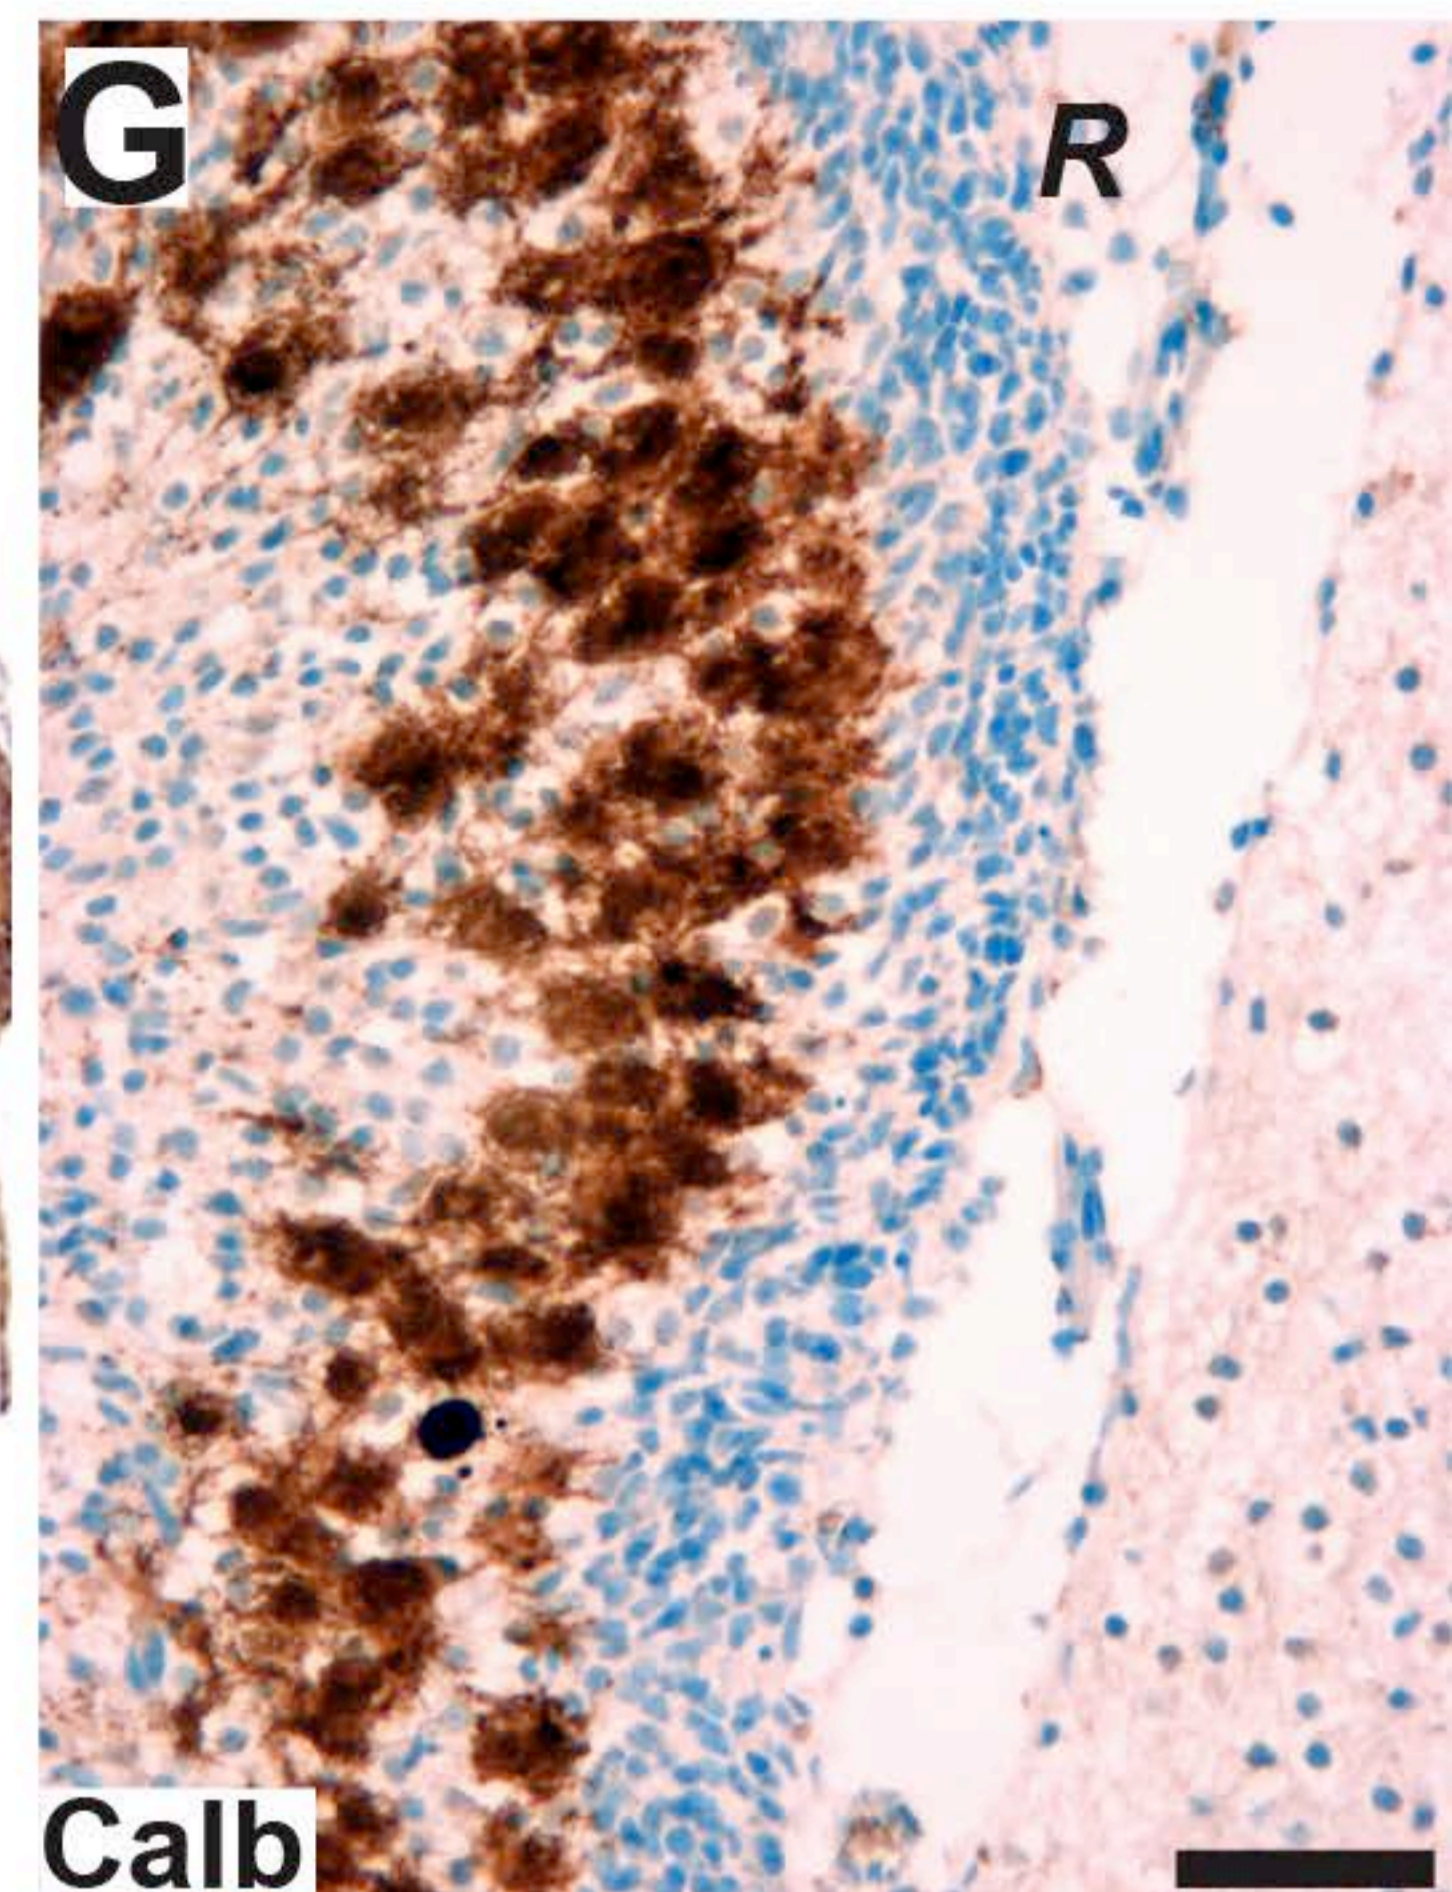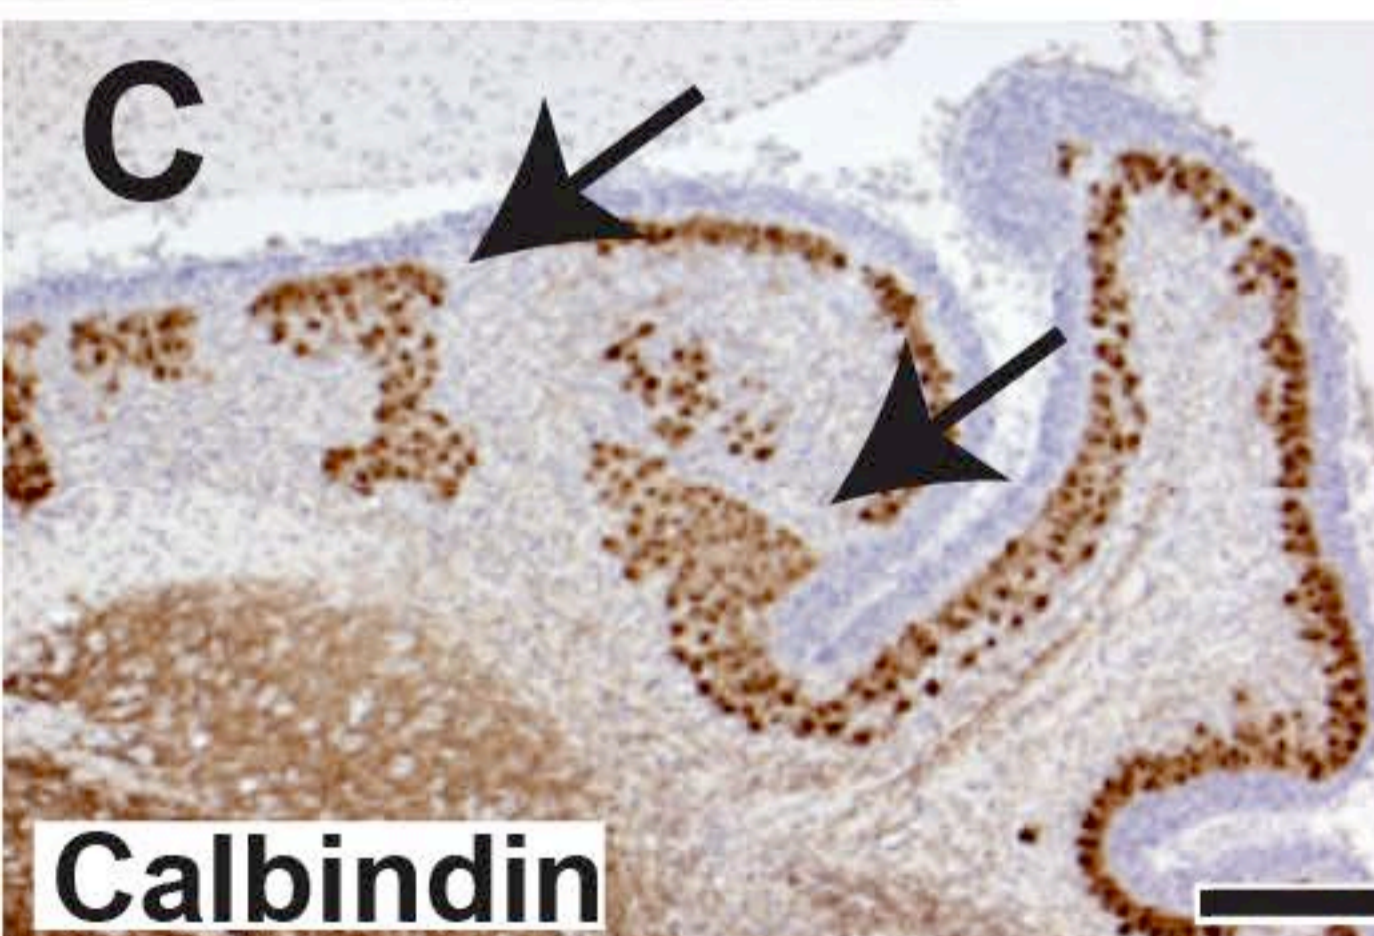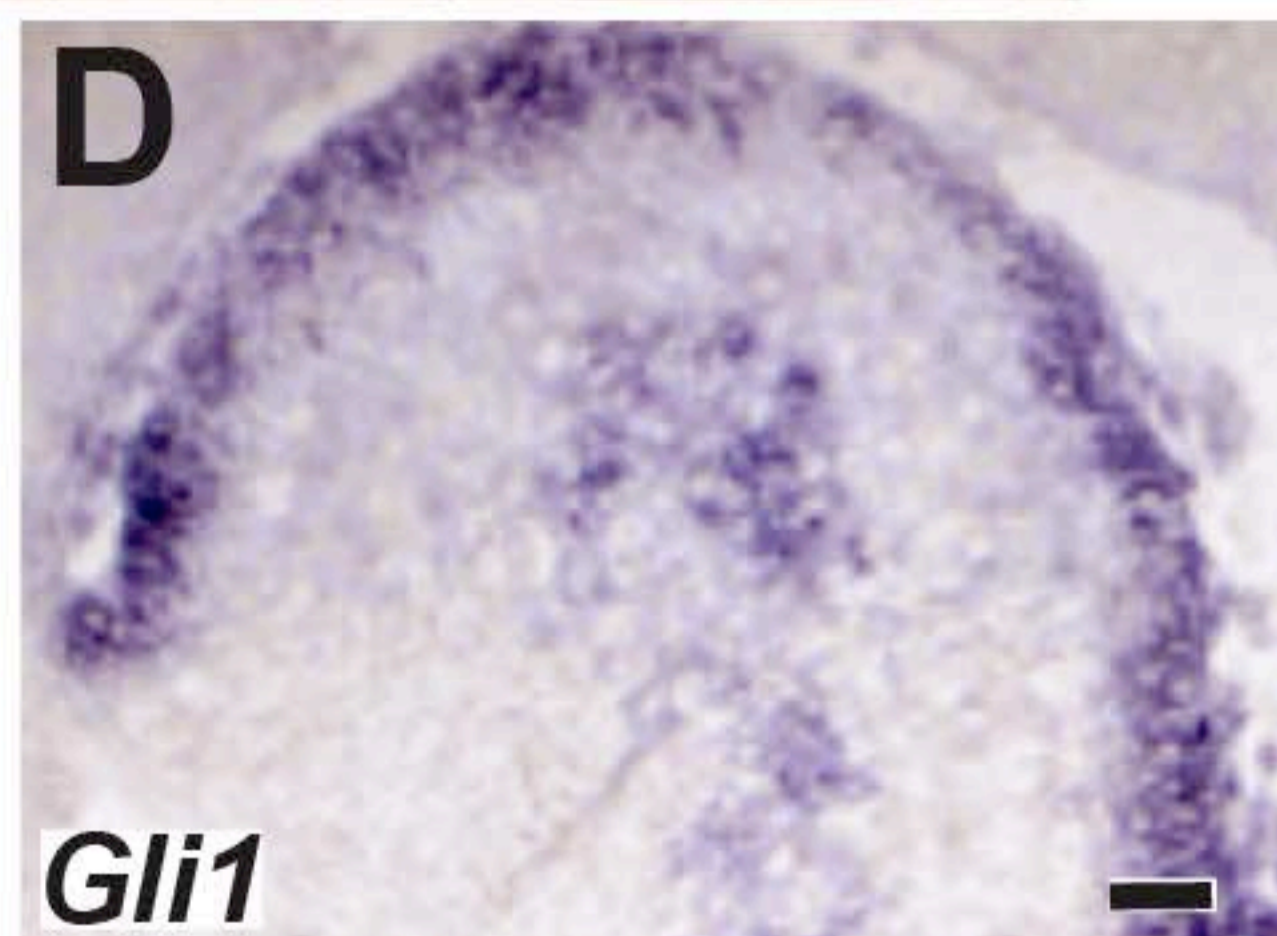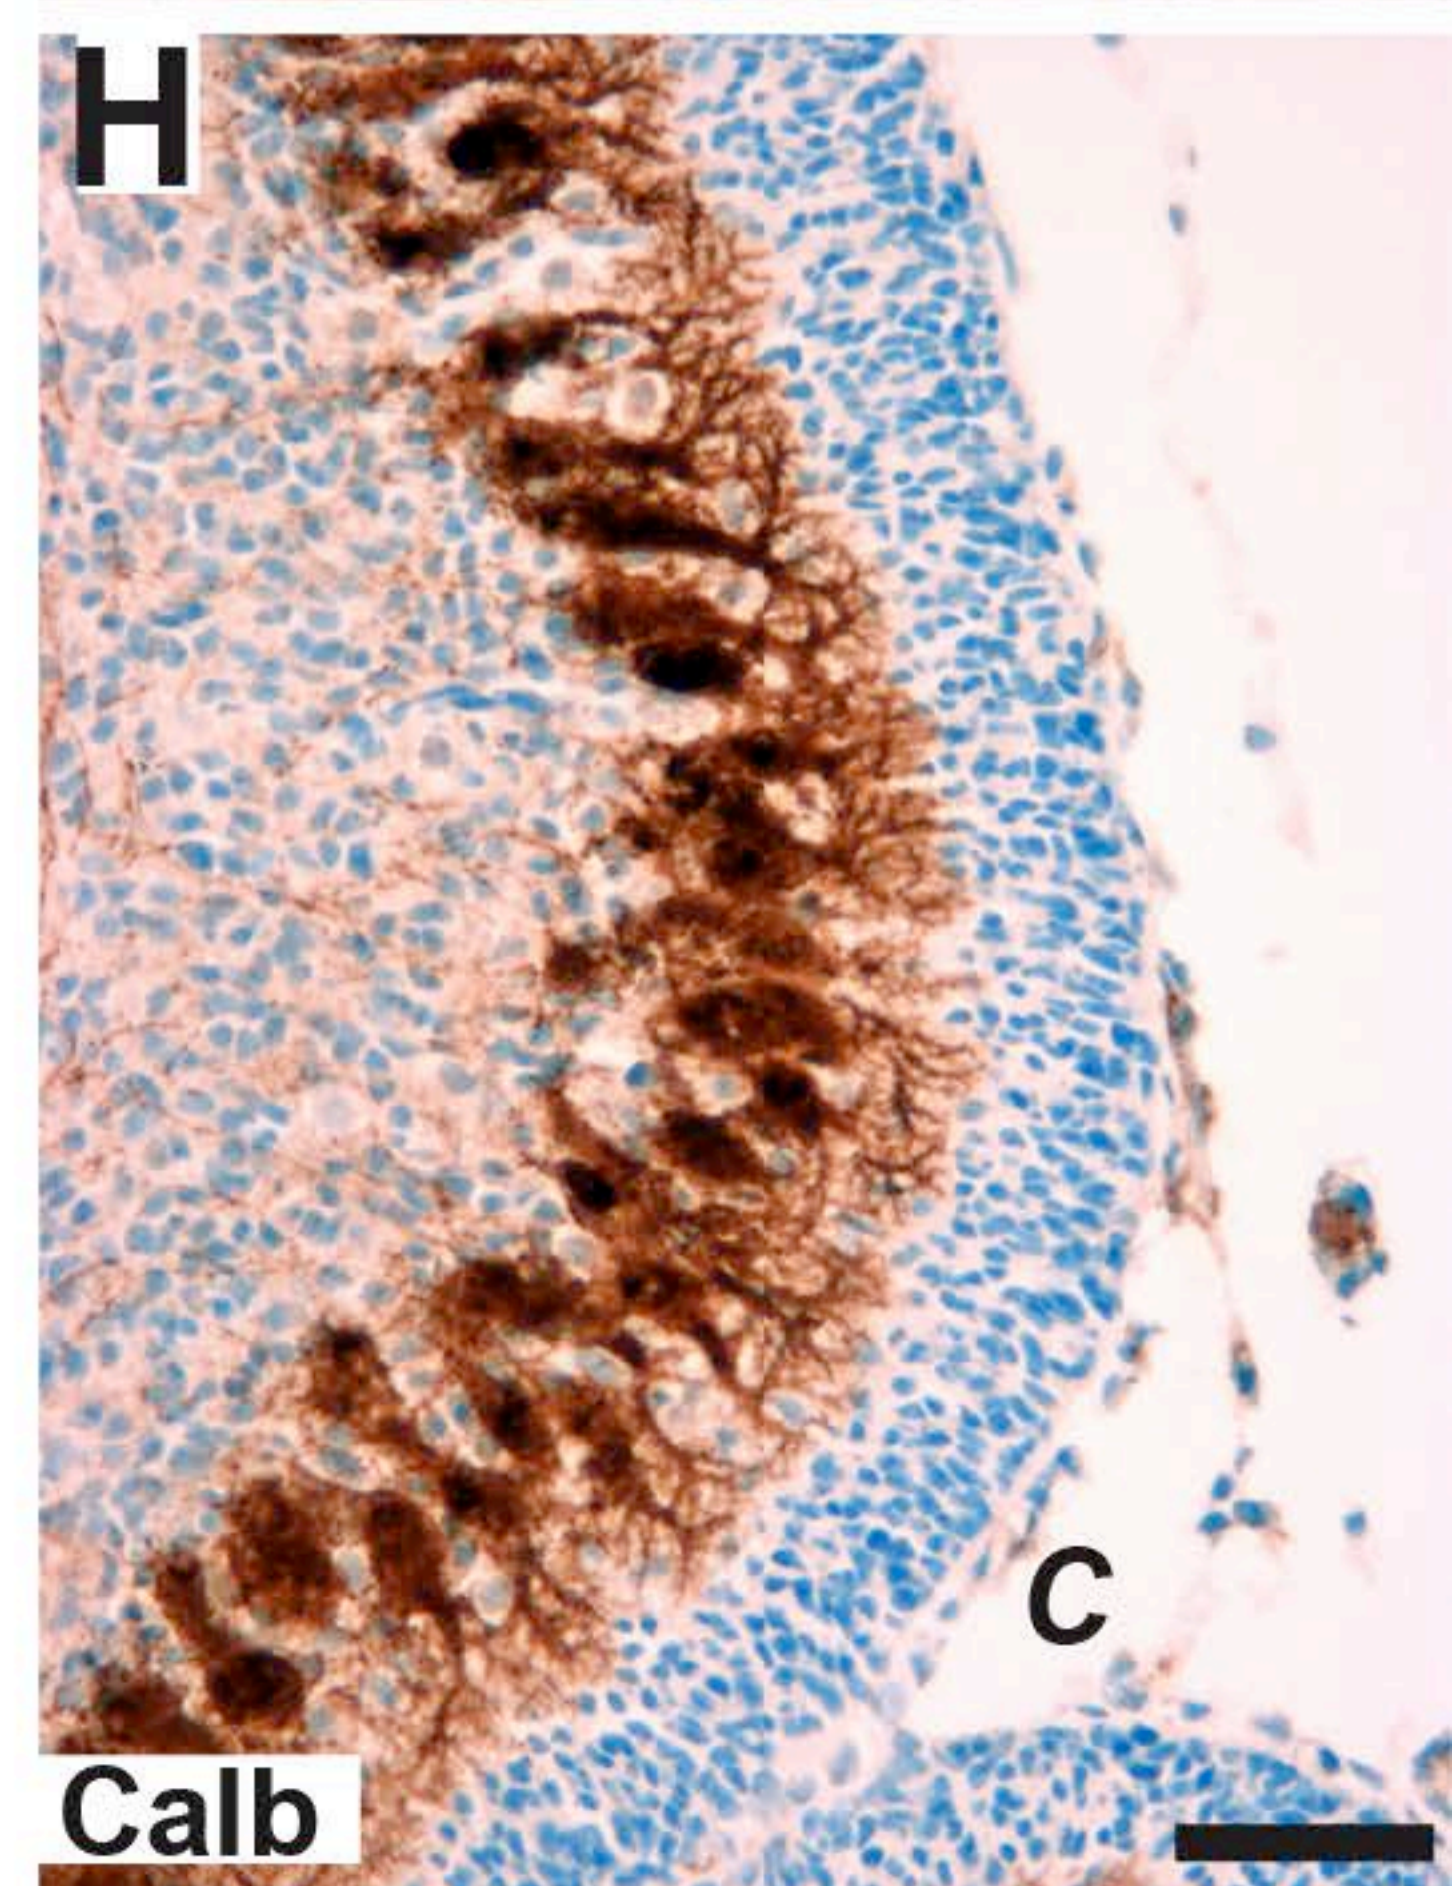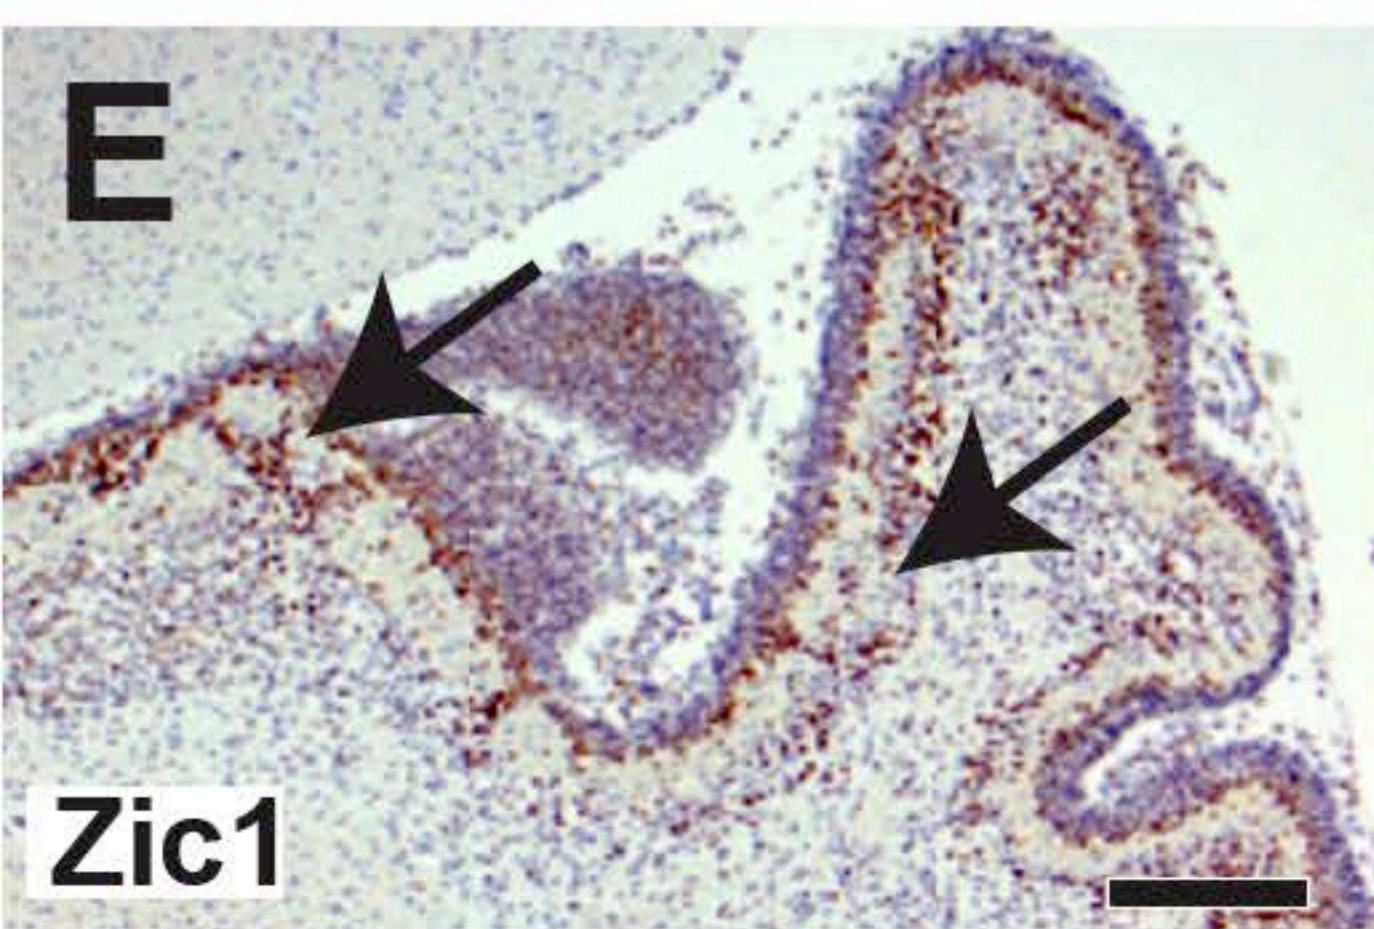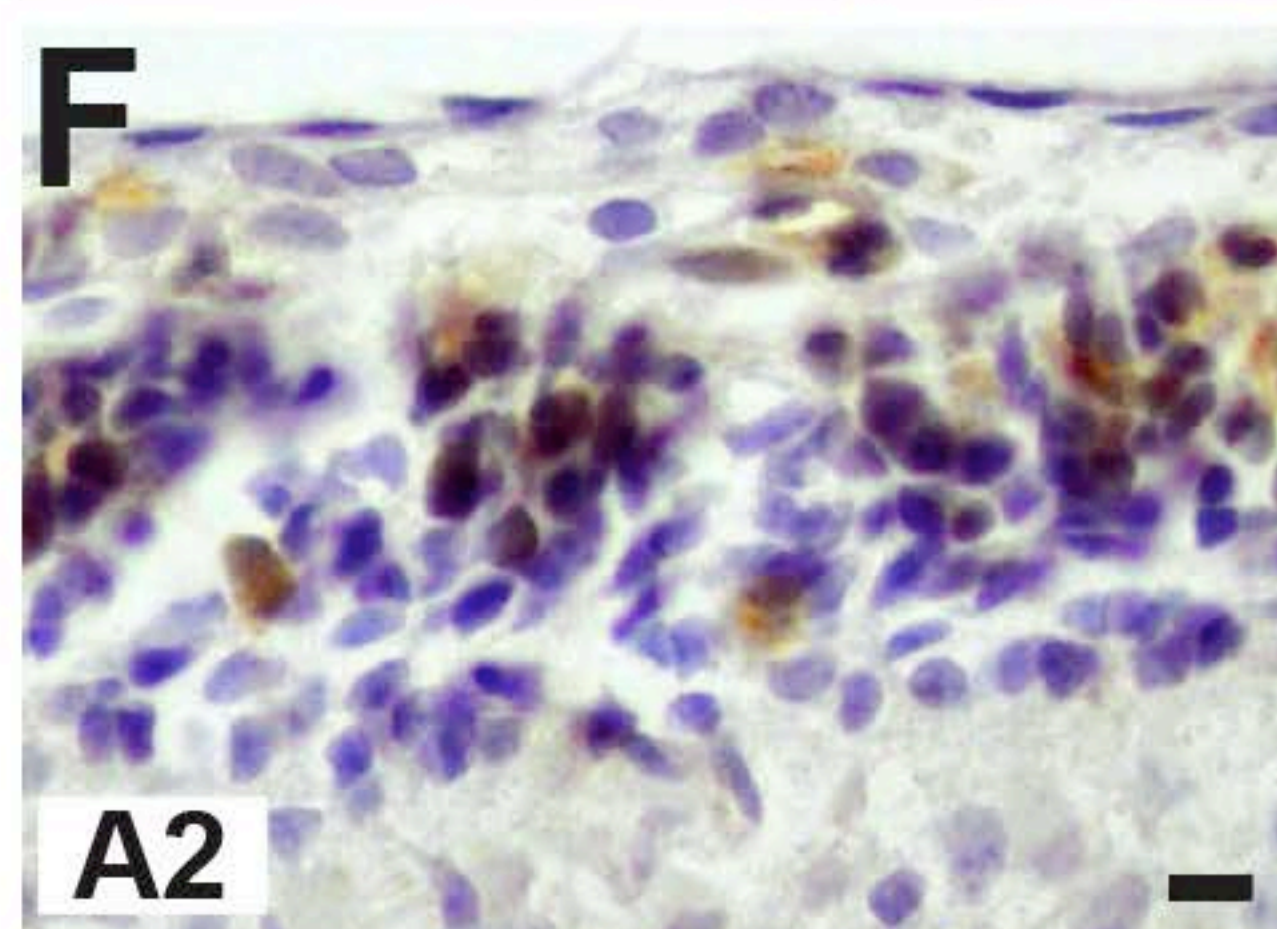

Supplement: NIHMS539665-supplement-05.pdf [file NIHMS539665-supplement-05.pdf]
